# Supplementary material for: One-pot, telescoped synthesis of N-aryl-5-aminopyrazoles from anilines in environmentally benign conditions
Source: Royal Society of Chemistry journal article supplement (doi:10.1039/c3ra47541g), 2014-01-01
Supplement: c3ra47541g.pdf [file c3ra47541g.pdf]

## One-pot, telescoped syntheses of *N*-aryl-5-aminopyrazoles from anilines in environmentally benign conditions

*Maura Marinozzi,\* Gloria Marcelli, Andrea Carotti and Benedetto Natalini*

Dipartimento di Chimica e Tecnologia del Farmaco, Università di Perugia, Via del Liceo, 1

06123 Perugia (Italy).

e-mail: maura.marinozzi@unipg.it

### SUPPORTING INFORMATION

#### Table of Contents:

|                                                                                                                      |     |
|----------------------------------------------------------------------------------------------------------------------|-----|
| Title page.                                                                                                          | S1  |
| General Information                                                                                                  | S2  |
| Characterizations of <i>N</i> -aryl-5 aminopyrazoles <b>3a-k</b> , <b>3o</b> , <b>3q-t</b> , <b>12</b> and <b>13</b> | S2  |
| <sup>1</sup> H- and <sup>13</sup> C spectra                                                                          | S8  |
| References                                                                                                           | S42 |

## General Information

Commercially available starting materials, reagents, and solvents were used as supplied. MPC was performed on Merck LiChroprep Si 60 Lobar columns.  $^1\text{H}$  and  $^{13}\text{C}$  NMR spectra were recorded on a Bruker AC400 spectrometer as solutions in  $\text{CDCl}_3$  or  $\text{DMSO-d}_6$ . Chemical shifts were recorded in ppm (d) downfield of tetramethylsilane. The spin multiplicities are indicated by the symbols s (singlet), d (doublet), t (triplet), q (quartet), m (multiplet), dt (doublet of triplet) tt (triplet of triplet) and bs (broad). IR spectra were recorded on a JASCO FT/IR-410,420 spectrometer using KBr pellets. Melting points were determined by the capillary method on a Büchi 535 electrothermal apparatus and are uncorrected.

### 1-(2-Chlorophenyl)-3-methyl-1*H*-pyrazol-5-amine (3a)

Light petroleum-EtOAc (1:1). Yield: 70 %. Mp 99-102 °C (from light petroleum/EtOAc) (lit.<sup>1</sup> 102-103 °C). IR (KBr):  $\nu_{\text{max}}/\text{cm}^{-1}$  3427, 3297, 2356, 1627, 1558, 1507, 1388, 1256, 1026, 762.  $^1\text{H}$  NMR (400 MHz,  $\text{CDCl}_3$ )  $\delta$  = 7.59-7.57 (m, 1H), 7.54-7.52 (m, 1H), 7.46-7.43 (m, 2H), 5.53 (s, 1H), 3.66 (bs, 2H), 2.30 (s, 3H).  $^{13}\text{C}$  NMR (100 MHz,  $\text{CDCl}_3$ )  $\delta$  = 149.88, 146.50, 135.81, 132.01, 130.23, 130.16, 127.79, 90.00, 13.91. Found: C, 58.0; H, 4.9, Cl, 17.2, N, 20.2. Calc. for  $\text{C}_{10}\text{H}_{10}\text{ClN}_3$ : C, 57.84; H, 4.85; Cl, 17.07, N, 20.24.

### 1-(3-Chlorophenyl)-3-methyl-1*H*-pyrazol-5-amine (3b)

Light petroleum-EtOAc (1:1). Yield: 65 %. Mp 135-138 °C (from light petroleum/EtOAc) (lit.<sup>2</sup> 138-140 °C). IR (KBr):  $\nu_{\text{max}}/\text{cm}^{-1}$  3351, 3186, 2919, 2345, 1633, 1599, 1585, 1558, 1501, 1430, 1393, 1306, 1097, 1013, 884, 825, 780, 754, 734.  $^1\text{H}$  NMR (400 MHz,  $\text{CDCl}_3$ )  $\delta$  = 7.64 (t, 1H,  $J$  = 1.94 Hz), 7.50 (ddd, 1H,  $J$  = 1.07, 1.96 and 8.00 Hz), 7.40 (t, 1H,  $J$  = 8.00), 7.30 (ddd, 1H,  $J$  = 1.07, 1.96 and 8.00), 5.48 (s, 1H), 3.80 (bs, 2H), 2.24 (s, 3H).  $^{13}\text{C}$  NMR (100 MHz,  $\text{CDCl}_3$ )  $\delta$  = 149.89, 145.35, 139.78, 134.98, 130.27, 126.81, 123.61, 121.23, 91.34, 13.80. Found: C, 58.1; H, 4.9; Cl, 17.2; N, 20.3. Calc. for  $\text{C}_{10}\text{H}_{10}\text{ClN}_3$ : C, 57.84; H, 4.85; Cl, 17.07, N, 20.24.

### 1-(4-Chlorophenyl)-3-methyl-1*H*-pyrazol-5-amine (3c)

Light petroleum-EtOAc (4:6). Yield: 68 %. Mp 109-110 °C (from light petroleum/EtOAc) (lit.<sup>3</sup> 109-111 °C). IR (KBr):  $\nu_{\text{max}}/\text{cm}^{-1}$  3368, 3245, 2264, 1905, 1563, 1505, 1302, 1173, 1091, 1014, 837.  $^1\text{H}$  NMR

(400 MHz, CDCl<sub>3</sub>)  $\delta$  = 8.34 (d, 2H, J = 9.20 Hz), 7.91 (d, 2H, J = 9.20 Hz), 5.49 (s, 1H), 3.90 (bs, 2H), 2.26 (s, 3H). <sup>13</sup>C NMR (100 MHz, CDCl<sub>3</sub>)  $\delta$  = 149.70, 145.26, 137.22, 132, 43, 129.42, 124.73, 91.20, 13.81. Found: C, 58.1; H, 4.9; Cl, 17.2; N, 20.2. Calc. for C<sub>10</sub>H<sub>10</sub>ClN<sub>3</sub>: C, 57.84; H, 4.85; Cl, 17.07, N, 20.24.

### 1-(2-Bromophenyl)-3-methyl-1H-pyrazol-5-amine (3d)

Light petroleum-EtOAc (6:4). Yield: 67 %. IR (KBr):  $\nu_{\max}/\text{cm}^{-1}$  3438, 3296, 3173, 2925, 2335, 1627, 1554, 1500, 1385, 1305, 1254, 1071, 1028, 952, 800, 763. <sup>1</sup>H NMR (400 MHz, CDCl<sub>3</sub>)  $\delta$  = 7.77-7.76 (d, 1H, J = 8.01 Hz), 7.53-7.50 (m, 2H), 7.40-7.32 (m, 1H), 5.53 (s, 1H), 3.66 (bs, 2H), 2.31 (s, 3H). <sup>13</sup>C NMR (100 MHz, CDCl<sub>3</sub>)  $\delta$  = 149.78, 146.26, 137.46, 133.44, 130.56, 130.44, 128.48, 122.29, 90.02, 13.98. Found: C, 47.8; H, 4.1; Br, 33.0; N, 16.7. Calc. for C<sub>10</sub>H<sub>10</sub>BrN<sub>3</sub>: C, 47.64; H, 4.00; Br, 31.69, N, 16.67.

### 3-Methyl-1-(2-nitrophenyl)-1H-pyrazol-5-amine (3e)

Light petroleum-EtOAc (4:6). Yield: 50 %. Mp 116-118 °C (from light petroleum/EtOAc) (lit.<sup>4</sup> 117-118 °C). IR (KBr):  $\nu_{\max}/\text{cm}^{-1}$  3299, 3217, 2354, 1630, 1585, 1565, 1528, 1387, 1355, 1299, 1151, 1025, 1007, 955, 853, 780, 747. <sup>1</sup>H NMR (400 MHz, CDCl<sub>3</sub>)  $\delta$  = 7.98 (dd, 1H, J = 1.2 and 8.00 Hz), 7.72 (dt, 1H, J = 1.6 and 8.0 Hz), 7.63 (dd, 1H, J = 1.2 and 8.0 Hz), 7.57 (dt, 1H, J = 1.6 and 8.0 Hz), 5.50 (s, 1H), 3.70 (bs, 2H), 2.21 (s, 3H). <sup>13</sup>C NMR (100 MHz, CDCl<sub>3</sub>)  $\delta$  = 150.93, 146.50, 145.91, 133.37, 131.56, 129.12, 128.91, 125.07, 91.69, 13.82. Found: C, 55.1; H, 4.7; N, 25.4. Calc. for C<sub>10</sub>H<sub>10</sub>N<sub>4</sub>O<sub>2</sub>: C, 55.04; H, 4.62; N, 25.68, O, 14.66.

### 3-Methyl-1-(4-nitrophenyl)-1H-pyrazol-5-amine (3f)

Light petroleum-EtOAc (4:6). Yield: 48 %. Mp 160-164 °C (from light petroleum/EtOAc). IR (KBr):  $\nu_{\max}/\text{cm}^{-1}$  3402, 3307, 2433, 1599, 1514, 1340, 1176, 1113, 1035, 1012, 854, 770, 751. <sup>1</sup>H NMR (400 MHz, CDCl<sub>3</sub>)  $\delta$  = 7.56 (d, 2H, J = 8.70 Hz), 7.46 (d, 2H, 8.70 Hz), 5.58 (s, 1H), 3.75 (bs, 2H), 2.28 (s, 3H). <sup>13</sup>C NMR (100 MHz, CDCl<sub>3</sub>)  $\delta$  = 151.27, 145.84, 144.97, 144.32, 124.98, 122.05, 93.26, 13.89. Found: C, 55.1; H, 4.7; N, 25.5. Calc. for C<sub>10</sub>H<sub>10</sub>N<sub>4</sub>O<sub>2</sub>: C, 55.04; H, 4.62; N, 25.68, O, 14.66.

### **2-(5-Amino-3-methyl-1*H*-pyrazol-1-yl)benzoic acid (3g)**

Light petroleum-EtOAc (4:6). Yield: 65 %. Mp 245-248 °C (from light petroleum/EtOAc). IR (KBr):  $\nu_{\max}/\text{cm}^{-1}$  2900, 1682, 1608, 1580, 1191, 1389, 1340, 1235, 1160, 1120, 860, 754.  $^1\text{H}$  NMR (400 MHz, DMSO- $d_6$ )  $\delta$  = 12.10 (s, 1H), 8.16-8.14 (dd, 1H,  $J$  = 1.4 and 7.9 Hz), 8.05-8.03 (dd, 1H, 0.4 and 7.74 Hz), 7.89 (td, 1H,  $J$  = 7.34 and 1.48 Hz), 7.48 (td, 1H, 8.25 and 1.03 Hz), 5.8 (s, 1H), 3.33 (s, 3H).  $^{13}\text{C}$  NMR (100 MHz, DMSO- $d_6$ )  $\delta$  = 158.87, 151.64, 139.39, 137.79, 135.45, 128.57, 125.11, 116.13, 114.49, 88.89, 14.38. Found: C, 61.1; H, 5.0; N, 19.2. Calc. for  $\text{C}_{11}\text{H}_{11}\text{N}_3\text{O}_2$ : C, 60.82; H, 5.10; N, 19.34; O, 14.73.

### **3-(5-Amino-3-methyl-1*H*-pyrazol-1-yl)benzoic acid hydrochloride (3h)**

Yield: 45 %. Mp 270-274 °C (from MeOH/ $\text{H}_2\text{O}$ ). IR (KBr):  $\nu_{\max}/\text{cm}^{-1}$  3294, 2806, 1689, 1635, 1579, 1494, 1464, 1251, 1122, 1013, 900, 854, 795, 757.  $^1\text{H}$  NMR (400 MHz, DMSO- $d_6$ )  $\delta$  = 8.12-8.10 (dd, 2H,  $J$  = 1.75 and 3.49 Hz), 7.91-7.89 (d, 1H,  $J$  = 8.59 Hz), 7.79-7.75 (t, 1H,  $J$  = 8.1 Hz), 5.77 (s, 1H), 2.31 (s, 3H).  $^{13}\text{C}$  NMR (100 MHz, DMSO- $d_6$ )  $\delta$  = 166.70, 151.25, 148.72, 134.74, 133.03, 130.86, 130.40, 130, 126.43, 91.96, 12.28. Found: C, 52.2; H, 4.8; Cl, 13.8; N, 17.0. Calc. for  $\text{C}_{11}\text{H}_{12}\text{ClN}_3\text{O}_2$ : C, 52.08; H, 4.77; Cl, 13.98; N, 16.56; O, 12.61.

### **4-(5-Amino-3-methyl-1*H*-pyrazol-1-yl)benzoic acid hydrochloride (3i)**

Yield: 65 %. Mp 232-233 °C (from MeOH/ $\text{H}_2\text{O}$ ) (lit.<sup>5</sup> 232 °C). IR (KBr):  $\nu_{\max}/\text{cm}^{-1}$  3308, 2714, 1696, 1629, 1574, 1513, 1457, 1419, 1388, 1236, 1189, 1119, 1011, 862, 782, 766.  $^1\text{H}$  NMR (400 MHz, DMSO- $d_6$ )  $\delta$  = 8.11-8.09 (d, 2H,  $J$  = 8.47 Hz), 7.75-7.73 (d, 2H,  $J$  = 8.52 Hz), 6.40-4.20 (bs, 2H), 5.65 (s, 1H), 2.23 (s, 3H).  $^{13}\text{C}$  NMR (100 MHz, DMSO- $d_6$ )  $\delta$  = 166.90, 150.90, 149.25, 138.47, 131.29 (x2), 131.11, 124.91 (x2), 91.96, 12.28. Found: C, 53.0; H, 4.9; Cl, 14.0; N, 16.1. Calc. for  $\text{C}_{11}\text{H}_{12}\text{ClN}_3\text{O}_2$ : C, 52.08; H, 4.77; Cl, 13.98; N, 16.56; O, 12.61.

### **2-(5-Amino-3-methyl-1*H*-pyrazol-1-yl)benzenesulfonamide (3j)**

Light petroleum-EtOAc (1:1). Yield: 61 %. Mp 181-183°C (from light petroleum/EtOAc). IR (KBr):  $\nu_{\max}/\text{cm}^{-1}$  3460, 3366, 3225, 2357, 1634, 1558, 1516, 1347, 1162, 1301, 1127, 1086, 1011, 769.  $^1\text{H}$  NMR (400 MHz, MeOH- $d_4$ )  $\delta$  = 8.20-8.18 (d, 1H,  $J$  = 7.8 Hz), 7.83-7.79 (t, 1H,  $J$  = 7.8 Hz), 7.73-7.69

(t, 1H,  $J = 7.8$  Hz), 7.55-7.53 (d, 1H,  $J = 7.8$  Hz), 5.51 (s, 1H), 2.23 (s, 3H).  $^{13}\text{C}$  NMR (100 MHz, MeOH- $d_4$ )  $\delta = 152.05, 151.03, 141.79, 136.68, 134.57, 131.45, 130.63, 129.91, 90.93, 13.74$ . Found: C, 47.5; H, 4.8; N, 22.2; S, 12.5. Calc. for  $\text{C}_{10}\text{H}_{12}\text{N}_4\text{O}_2\text{S}$ : C, 47.61; H, 4.79; N, 22.21, O, 12.68, S, 12.71.

### 3-Methyl-1-phenyl-1H-pyrazol-5-amine (3k)

Light petroleum-EtOAc (1:1). Yield: 36 %. Mp 110-113 °C (from light petroleum/EtOAc) (lit.<sup>6</sup> 110-111.5°C). IR (KBr):  $\nu_{\text{max}}/\text{cm}^{-1}$  3445 3144, 2358, 1622, 1594, 1553, 1510, 1436, 1391, 1367, 1315, 1141, 1072, 1023, 1010, 914, 798, 761.  $^1\text{H}$  NMR (400 MHz,  $\text{CDCl}_3$ )  $\delta = 7.59$  (dd, 2H,  $J = 1.3$  and 7.5 Hz), 7.50 (t, 2H,  $J = 7.5$  Hz), 7.37 (tt, 1H,  $J = 1.3$  and 7.5 Hz), 5.49 (s, 1H), 3.75 (bs, 2H), 2.28 (s, 3H).  $^{13}\text{C}$  NMR (100 MHz,  $\text{CDCl}_3$ )  $\delta = 149.32, 145.24, 138.58, 129.33, 126.98, 123.75, 90.65, 13.83$ . Found: C, 69.5; H, 6.55; N, 24.2. Calc. for  $\text{C}_{10}\text{H}_{11}\text{N}_3$ : C, 69.34; H, 6.40; N, 24.26.

### [4-(5-Amino-3-methyl-pyrazol-1-yl)-phenyl]-acetic acid hydrochloride (3o)

Yield: 65 %. Mp 258-260 °C (from  $\text{H}_2\text{O}$ ). IR (KBr):  $\nu_{\text{max}}/\text{cm}^{-1}$  3469, 3321, 3194, 2326, 1714, 1631, 1574, 1516, 1403, 1288, 1227, 1204, 1182, 1113, 1017, 915, 859, 828, 790.  $^1\text{H}$ -NMR (400 MHz, DMSO- $d_6$ )  $\delta = 7.55$ -7.49 (m, 4H), 5.68 (s, 1H), 3.71 (s, 2H), 2.26 (s, 3H). Found: C, 53.9; H, 5.4; Cl, 13.2; N, 15.6. Calc. for  $\text{C}_{12}\text{H}_{14}\text{ClN}_3\text{O}_2$ : C, 53.84; H, 5.27; Cl, 13.24; N, 15.70; O, 11.95.

### 1-(2-Methoxyphenyl)-3-methyl-1H-pyrazol-5-amine (3q)

Light petroleum-EtOAc (1:1). Yield: 20 %. IR (KBr):  $\nu_{\text{max}}/\text{cm}^{-1}$  3316, 3199, 2838, 2356, 1598, 1559, 1515, 1464, 1389, 1280 1021, 1241, 1123, 756.  $^1\text{H}$  NMR (400 MHz,  $\text{CDCl}_3$ )  $\delta = 7.50$  (dd, 1H,  $J = 1.7$  and 7.7 Hz), 7.49 (dt, 1H,  $J = 1.7$  and 7.7 Hz), 7.12-7.07 (m, 2H), 5.50 (s, 1H), 3.91 (s, 3H), 2.29 (s, 3H).  $^{13}\text{C}$  NMR (100 MHz,  $\text{CDCl}_3$ )  $\delta = 153.39, 149.71, 146.88, 129.47, 129.01, 127.58, 121.58, 112.31, 90.40, 56.22, 13.98$ . Found: C, 66.1; H, 6.6; N, 21.2. Calc. for  $\text{C}_{11}\text{H}_{13}\text{N}_3\text{O}$ : C, 65.01; H, 6.45; N, 20.68, O, 7.87.

### 3-Methyl-1-[3-(methylsulfonyl)phenyl]-1H-pyrazol-5-amine (3r)

Light petroleum-EtOAc (1:1). Yield: 25 %. Mp 164-167 °C (from light petroleum/EtOAc). IR (KBr):  $\nu_{\text{max}}/\text{cm}^{-1}$  3398, 3163, 2284, 1563, 1296, 1148, 964, 896, 741.  $^1\text{H}$  NMR (400 MHz,  $\text{CDCl}_3$ )  $\delta = 8.25$  (s,

1H), 7.96 (d, 1H, J = 7.6 Hz), 7.88 (d, 1H, J = 7.6 Hz), 7.71 (t, 1H, J = 7.6 Hz), 5.54 (s, 1H), 3.90 (bs, 2H), 3.12 (s, 3H), 2.26 (s, 3H). <sup>13</sup>C NMR (100 MHz, CDCl<sub>3</sub>) δ = 150.49, 145.61, 141.74, 139.88, 130.43, 127.88, 124.87, 121.69, 92.28, 44.28, 13.80. Found: C, 53.0; H, 5.3; N, 12.5, S, 12.9. Calc. for C<sub>11</sub>H<sub>13</sub>N<sub>3</sub>O<sub>2</sub>S: C, 52.57; H, 5.21; N, 16.72, O, 12.73, S, 12.76.

### **3-Methyl-1-(2-methyl-6-nitrophenyl)-1H-pyrazol-5-amine (3s)**

Light petroleum-EtOAc (4:6). Yield: 45 %. Mp 107-108 °C (from light petroleum/EtOAc). IR (KBr):  $\nu_{\max}/\text{cm}^{-1}$  3426, 3326, 2287, 1626, 1570, 1532, 1362, 1303, 1145, 1007, 920, 813, 801, 751. <sup>1</sup>H NMR (400 MHz, CDCl<sub>3</sub>) δ = 7.79 (d, 1H, J = 7.8 Hz), 7.61 (d, 1H, 7.8 Hz), 7.52, (t, 1H, J = 7.8 Hz), 5.51 (s, 1H), 3.66 (bs, 2H), 2.23 (s, 3H), 2.22 (s, 3H). <sup>13</sup>C NMR (100 MHz, CDCl<sub>3</sub>) δ = 150.84, 148.50, 147.51, 141.09, 134.94, 130.16, 129.57, 122.13, 90.39, 17.32, 13.96. Found: C, 56.75; H, 5.1; N, 24.1. Calc. for C<sub>11</sub>H<sub>12</sub>N<sub>4</sub>O<sub>2</sub>: C, 56.89; H, 5.21; N, 24.12, O, 13.78.

### **1-(2-Methoxy-4-nitrophenyl)-3-methyl-1H-pyrazol-5-amine (3t)**

Light petroleum-EtOAc (1:1). Yield: 42 %. Mp 121-123 °C (from light petroleum/EtOAc). IR (KBr):  $\nu_{\max}/\text{cm}^{-1}$  3628, 3432, 3330, 2349, 1631, 1563, 1515, 1341, 1251, 1028, 1101, 875, 821, 740. <sup>1</sup>H NMR (400 MHz, CDCl<sub>3</sub>) δ = 8.00 (dd, 1H, J = 2.4 and 8.6 Hz), 7.97 (d, 1H, J = 2.4 Hz), 7.69 (d, 1H, J = 8.6 Hz), 5.53 (s, 1H), 4.05 (s, 3H), 3.90 (bs, 2H), 2.28 (s, 3H). <sup>13</sup>C NMR (100 MHz, CDCl<sub>3</sub>) δ = 152.60, 151.55, 147.54, 147.42, 133.90, 129.05, 116.92, 107.71, 91.66, 56.98, 13.95. Found: C, 53.1; H, 4.8; N, 22.3. Calc. for C<sub>11</sub>H<sub>12</sub>N<sub>4</sub>O<sub>3</sub>: C, 53.22; H, 4.87; N, 22.57, O, 19.34.

### **1-(2-Chlorophenyl)-1H-pyrazol-5-amine (12)**

Light petroleum-EtOAc (7:3). IR (KBr):  $\nu_{\max}/\text{cm}^{-1}$  3316, 3193, 2280, 1622, 1558, 1512, 1480, 1444, 1407, 1346, 1215, 1035, 920, 762. <sup>1</sup>H NMR (400 MHz, CDCl<sub>3</sub>) δ = 7.62-7.46 (m, 5H), 5.71-5.70 (d, 1H, J = 1.7 Hz), 3.77- 3.20 (bs, 2H). <sup>13</sup>C NMR (100 MHz, CDCl<sub>3</sub>) δ = 145.93, 140.85, 135.72, 132.2, 130.52, 130.46, 130.1, 127.93, 90.16. Found: C, 56.0; H, 4.25; Cl, 18.2; N, 21.2. Calc. for C<sub>9</sub>H<sub>8</sub>ClN<sub>3</sub>: C, 55.83; H, 4.16; Cl, 18.31; N, 21.70.

### **1-(2-Chlorophenyl)-3-phenyl-1H-pyrazol-5-amine (13)**

Light petroleum-EtOAc (6:4). Mp 102-104 °C (from light petroleum/EtOAc) (lit.<sup>7</sup> 107-109 °C). IR (KBr):  $\nu_{\text{max}}/\text{cm}^{-1}$  3309, 3167, 2310, 1559, 1503, 1374, 1253, 1082, 1033, 953, 757. <sup>1</sup>H NMR (400 MHz, CDCl<sub>3</sub>)  $\delta$  = 7.89-7.87 (m, 2H), 7.64-7.62 (m, 2H), 7.49-7.32 (m, 5H), 6.05 (s, 1H), 4.1-3.45 (bs, 2H). <sup>13</sup>C NMR (100 MHz, CDCl<sub>3</sub>)  $\delta$  = 152.13, 135.74, 146.99, 133.22, 132.22, 130.58, 130.48, 130.37, 128.46 (x2), 128.03, 127.92, 125.70 (x2), 87.63. Found: C, 66.9; H, 4.5; Cl, 13.2; N, 15.4. Calc. for C<sub>15</sub>H<sub>12</sub>ClN<sub>3</sub>: C, 66.79; H, 4.48; Cl, 13.14; N, 15.58.

1-(2-chlorophenyl)-3-methyl-1H-pyrazol-5-amine  
CDCl<sub>3</sub> 400 MHz 05.09.2013

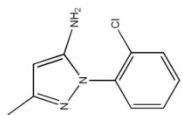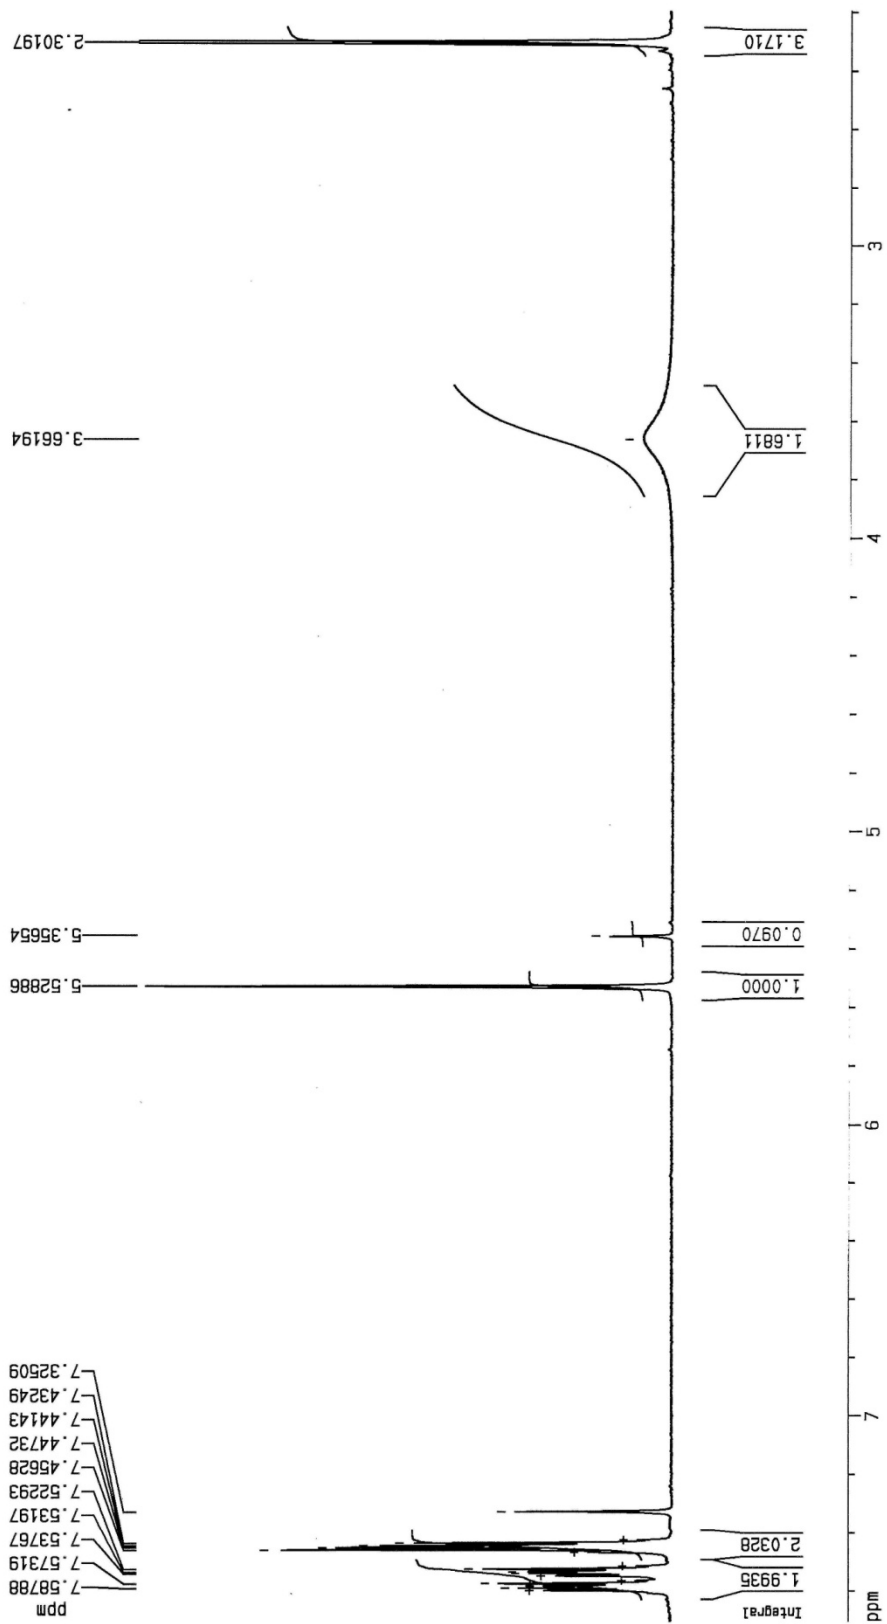



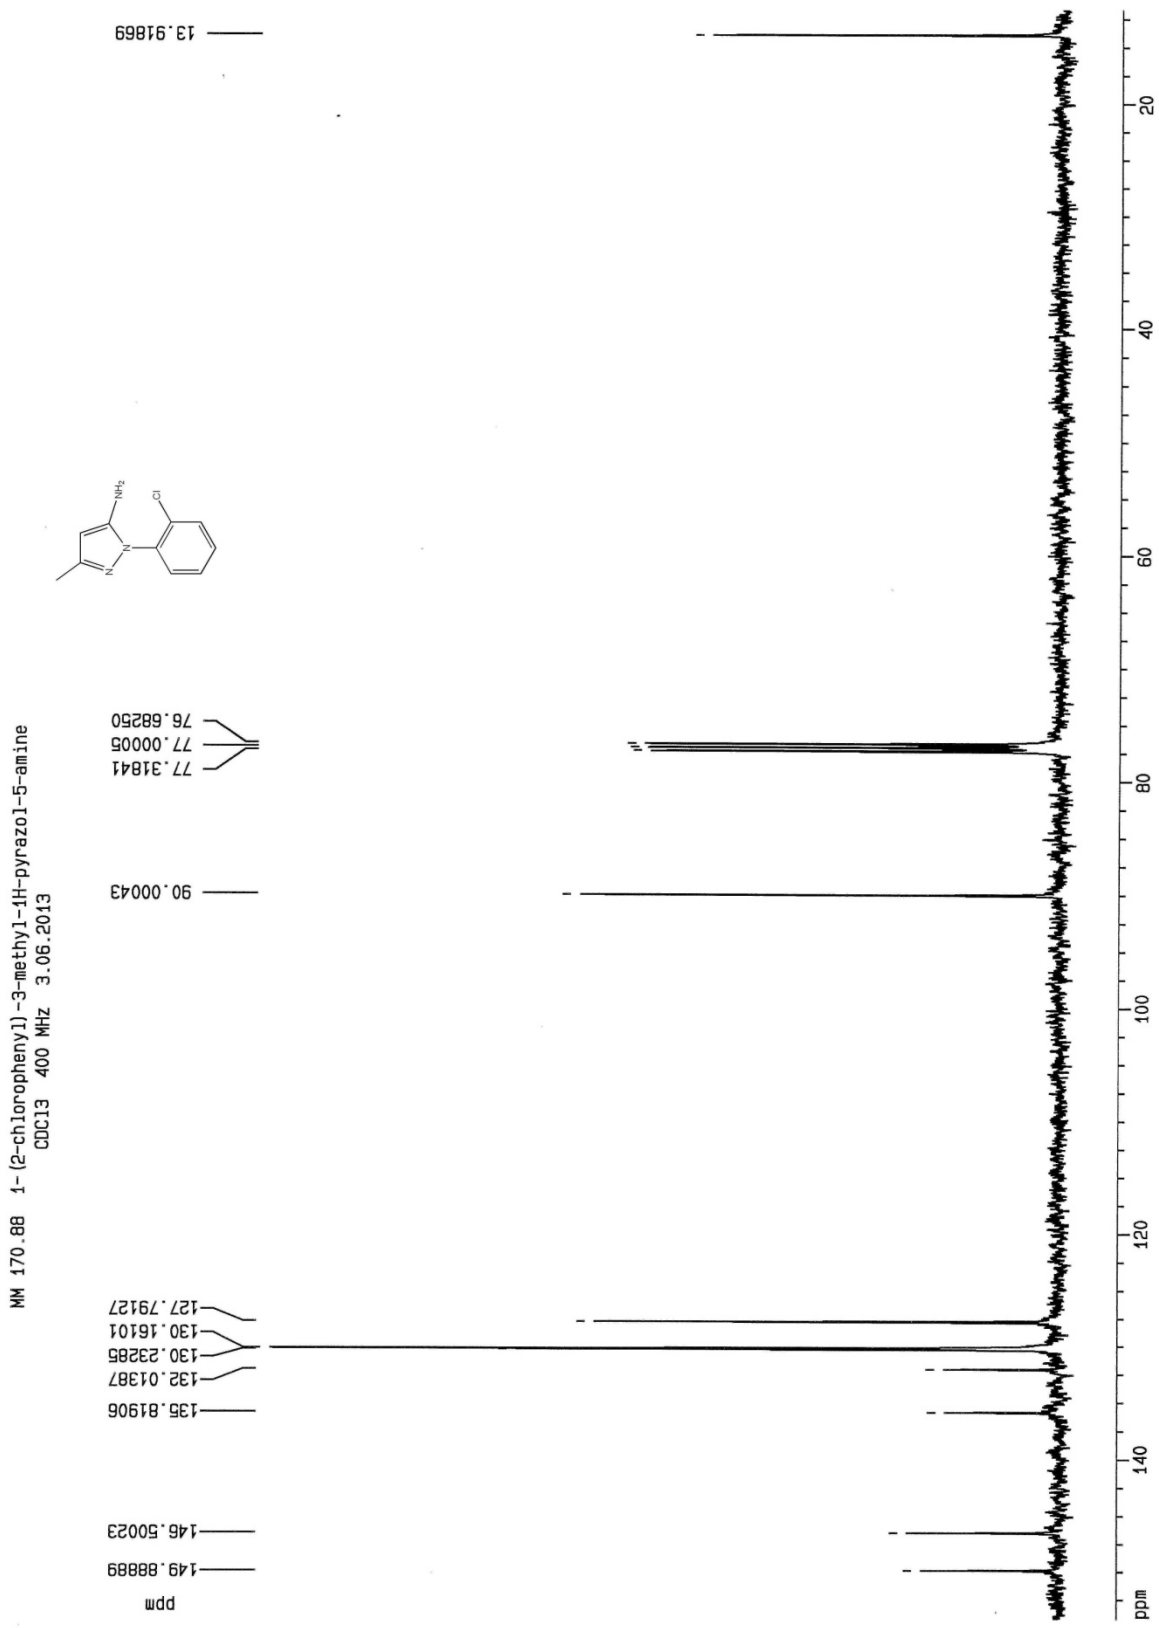

1-(3-chlorophenyl)-3-methyl-1H-pyrazol-5-amine  
CDC13 400 MHz 11.07.2013

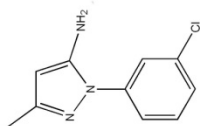

ppm  
7.6483  
7.64196  
7.63707  
7.49499  
7.49230  
7.49009  
7.41971  
7.39988  
7.37964  
7.31385  
7.31154  
7.28388

5.48633

3.80974

2.24714

2.06663

Integral  
1.0264  
1.0829  
1.1546  
1.6059

1.0000

1.8278

3.3017

ppm

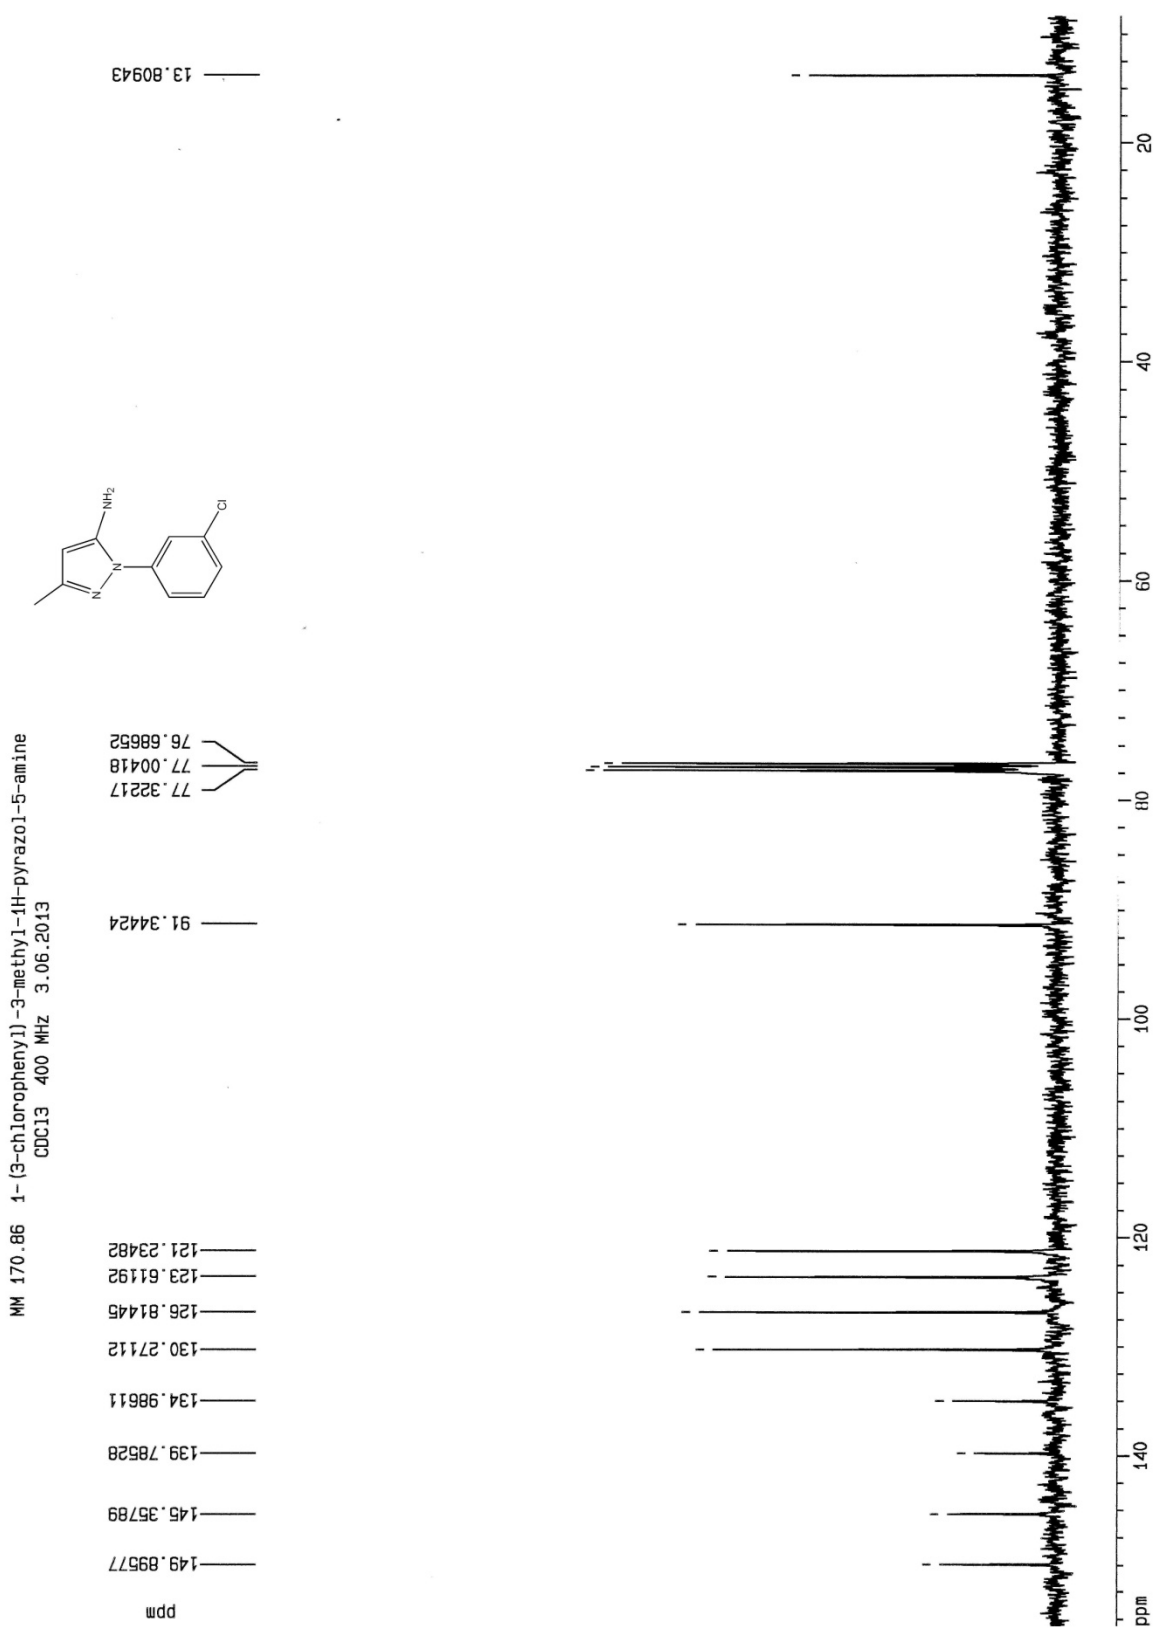

1-(4-chlorophenyl)-3-methyl-pyrazol-5-amine  
GM 205.100  
CDC13 400 MHz 7.06.2013

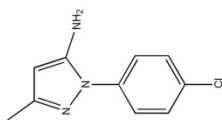

7.56799  
7.55133  
7.54628  
7.47178  
7.46651  
7.44996  
ppm

5.49626

2.26847

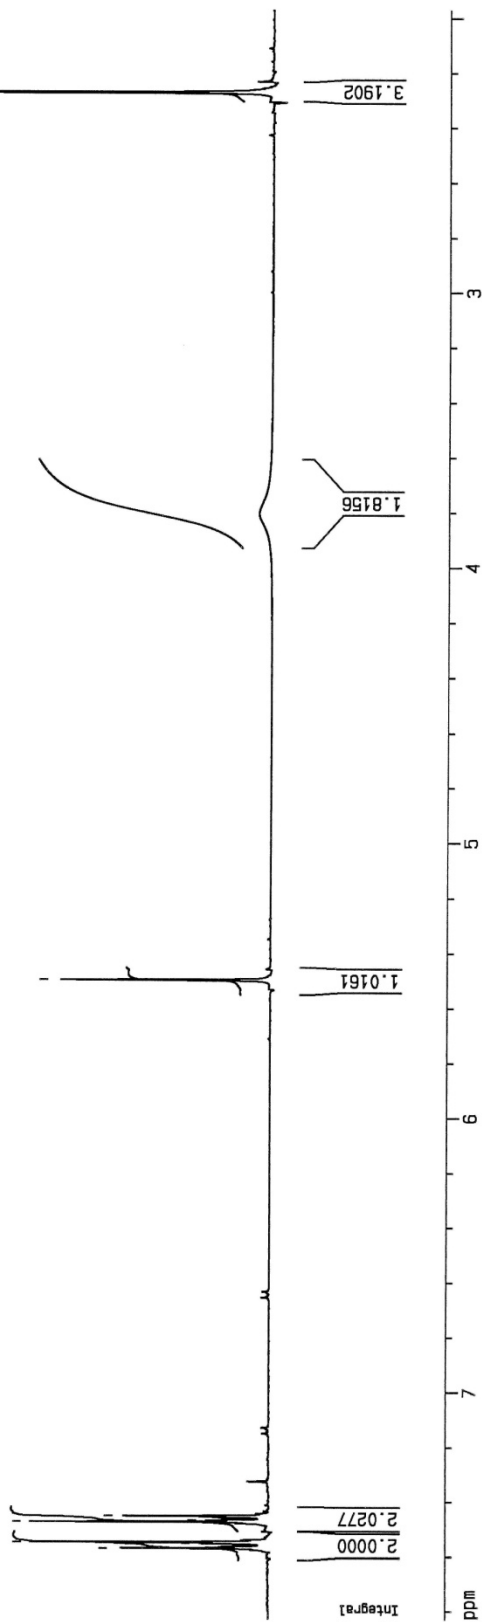

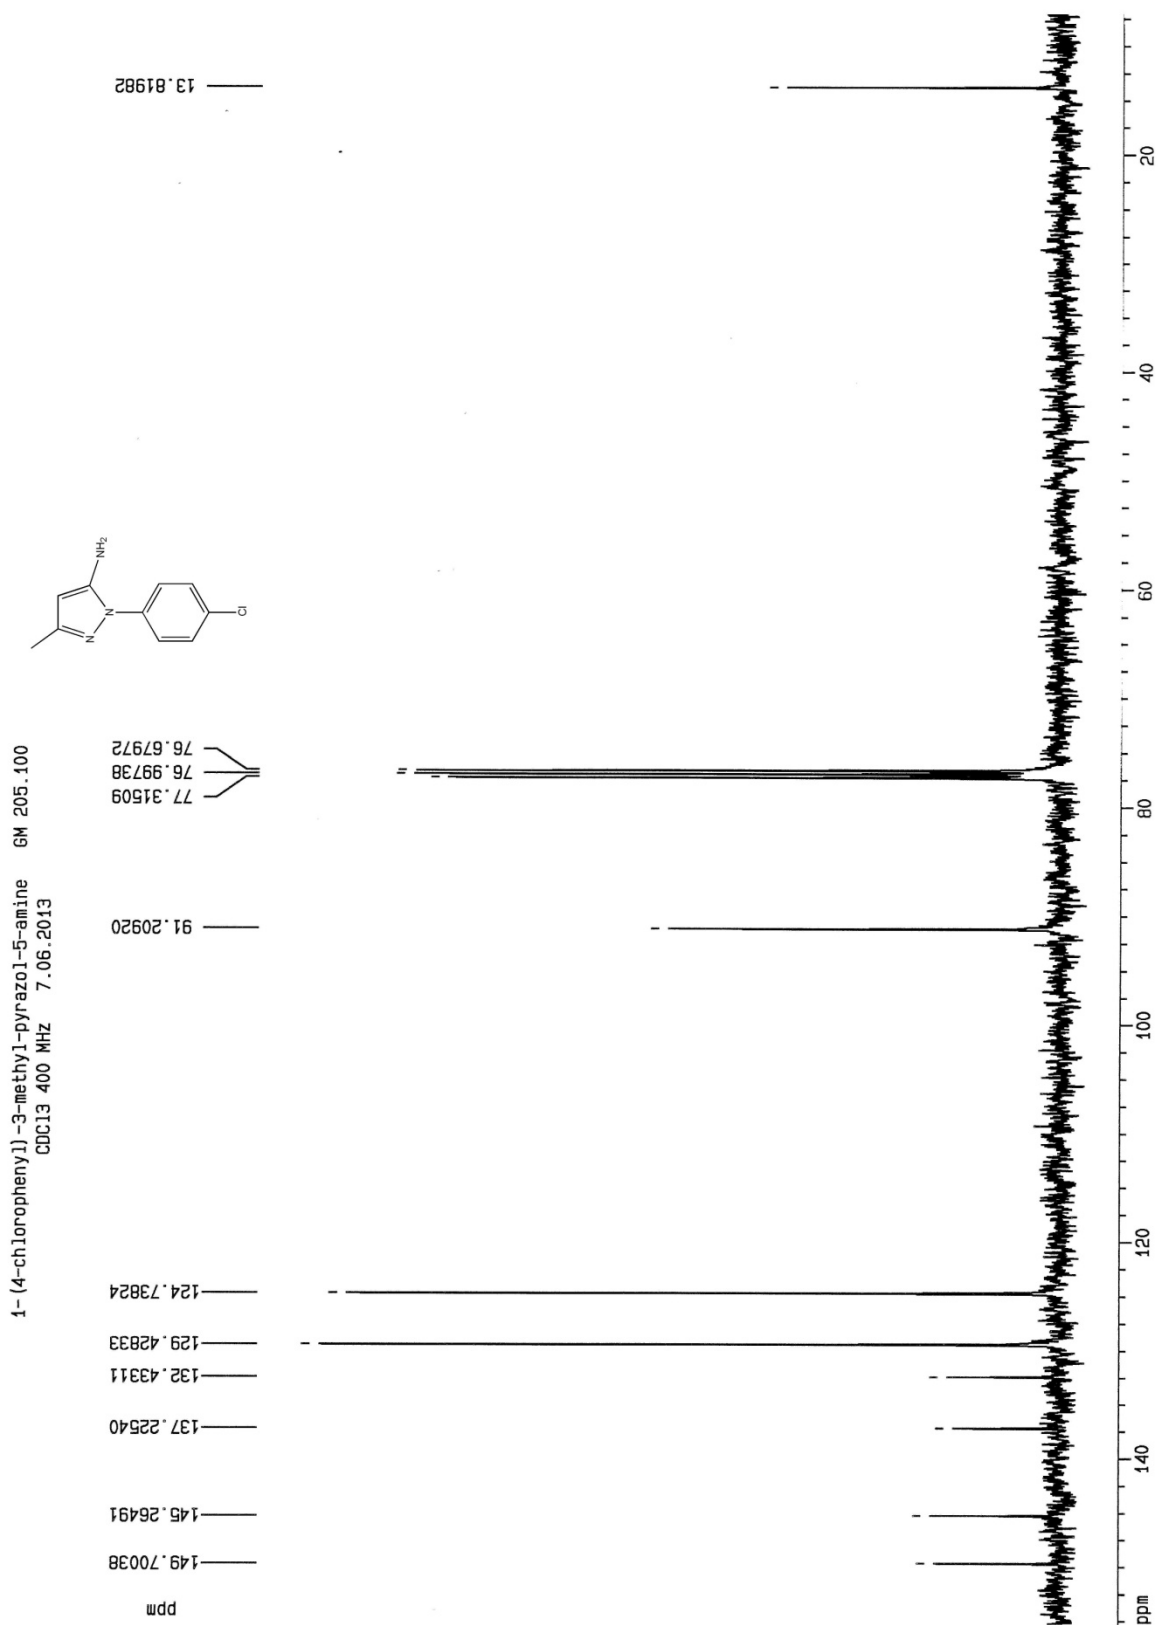

exp.49 GM 205.118 1-(2-bromophenyl)-3-methyl-1H-pyrazol-5-amine  
CDCl3 400 MHz 30.08 2013

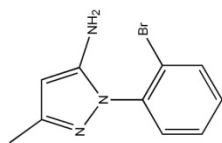

7.7796  
7.75795  
7.53554  
7.52071  
7.51592  
7.49619  
7.40341  
7.39810  
7.38566  
7.38327  
7.38082  
7.36585  
7.32403  
ppm

5.53485

3.66329

2.30957

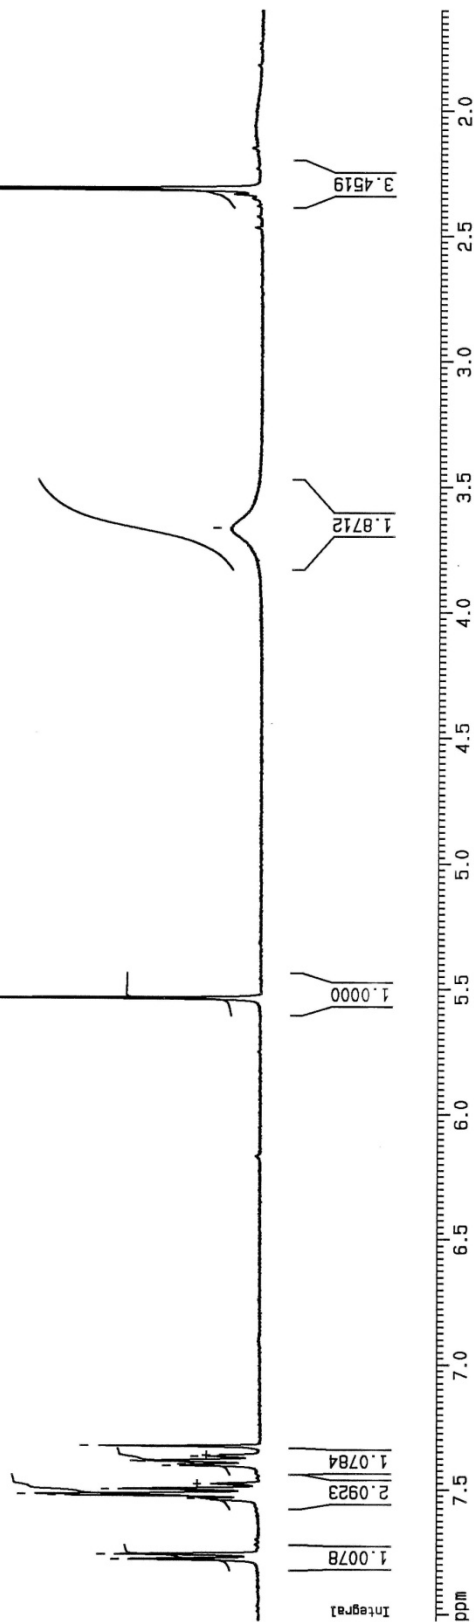

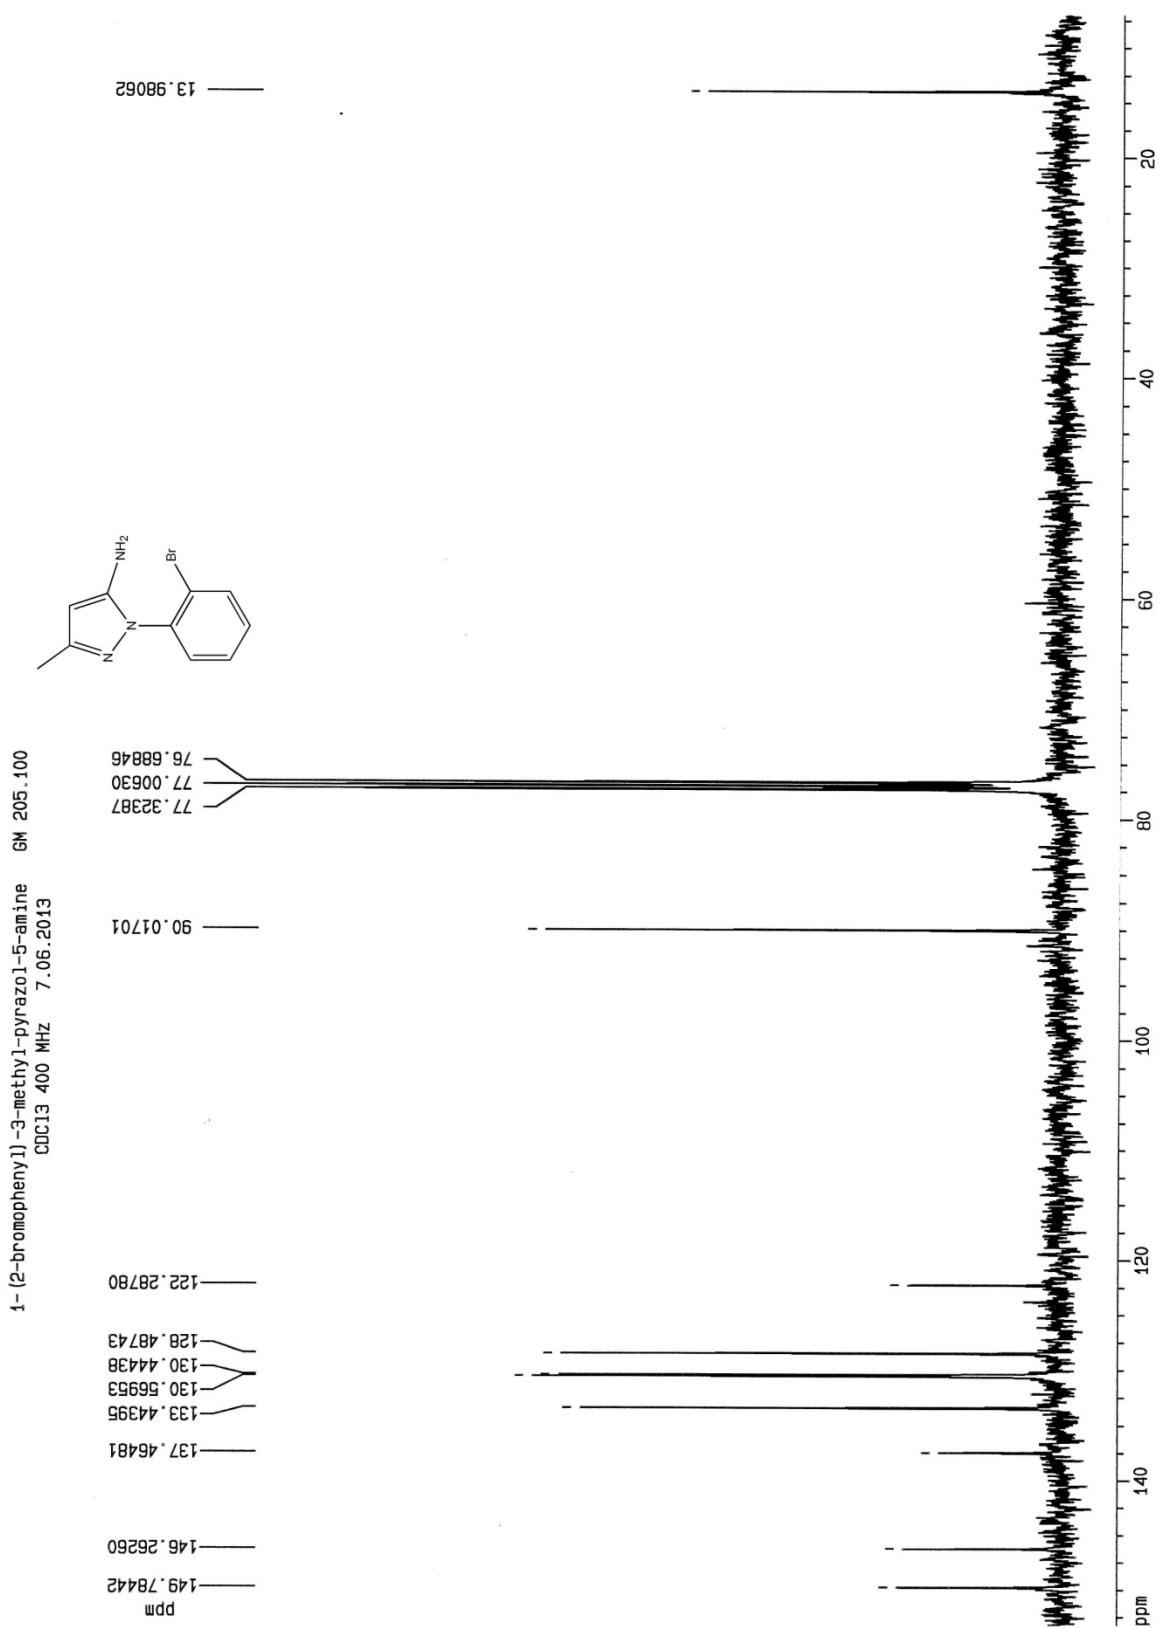

GM 205.104 1-(2-nitrophenyl)-3-methyl-1H-pyrazol-5-amine  
CDCl<sub>3</sub> 400 MHz 3.06.2013

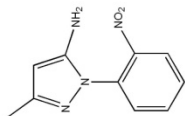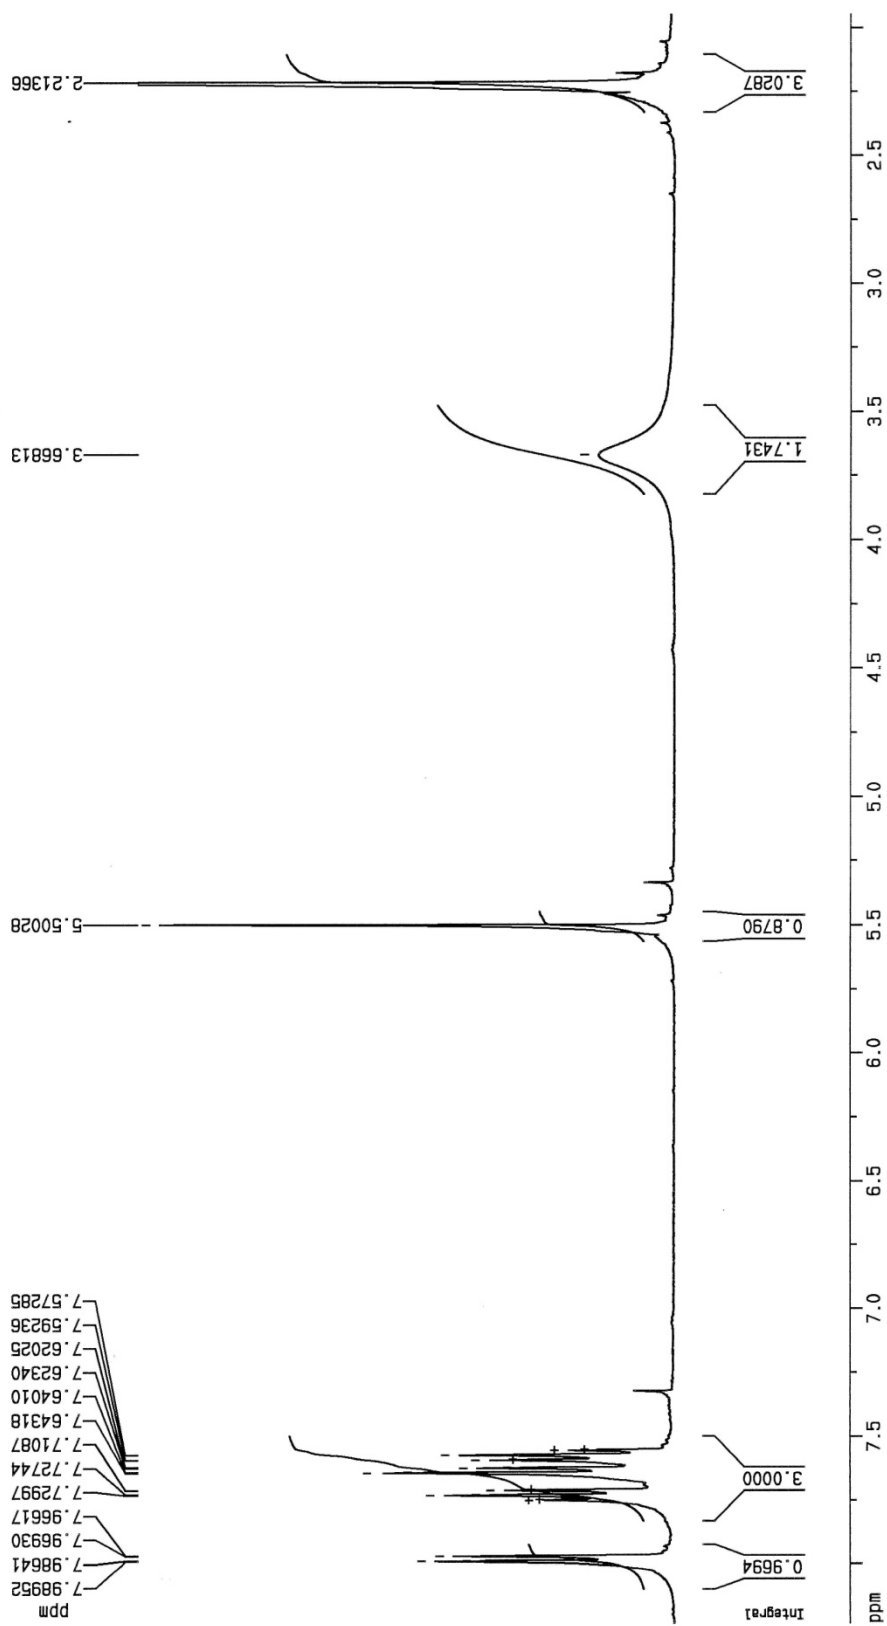



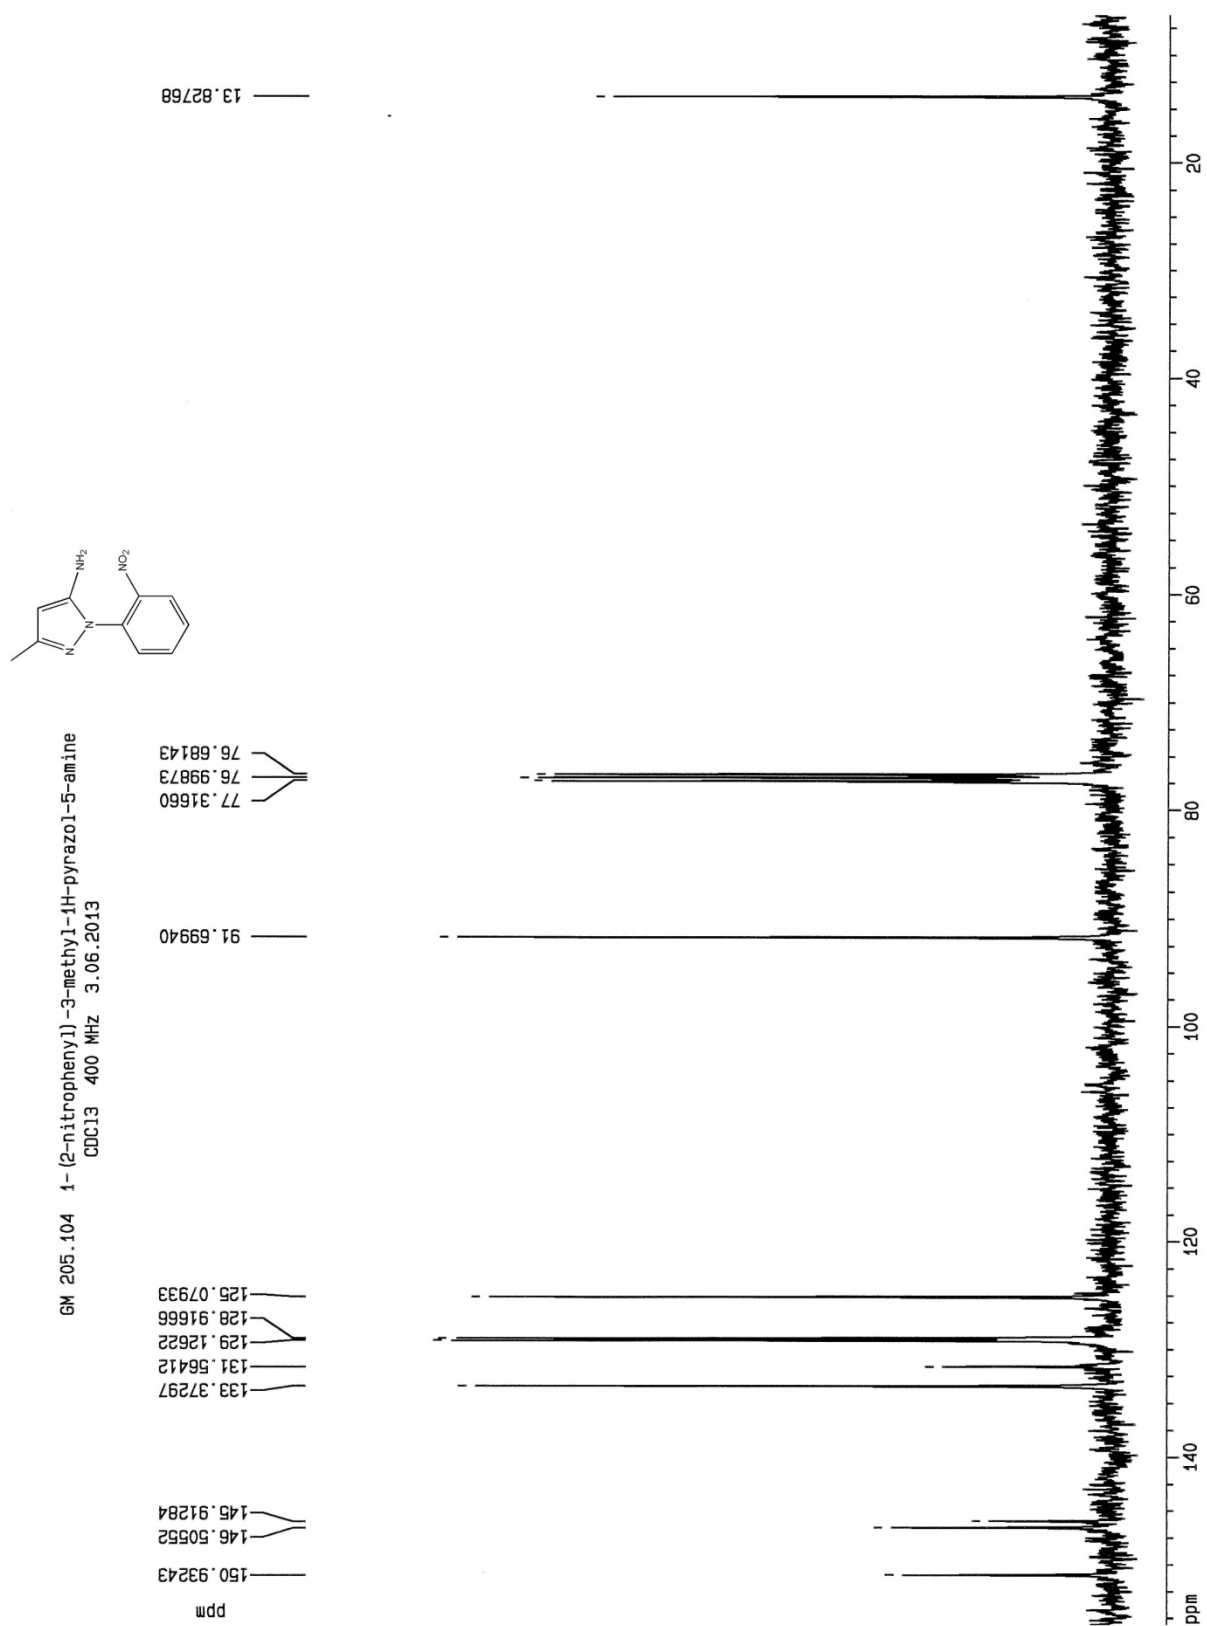

1-(4-nitrophenyl)-3-methyl-pyrazol-5-amine  
GM 205.117  
CDC13 400 MHz 25.06.2013

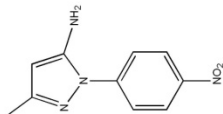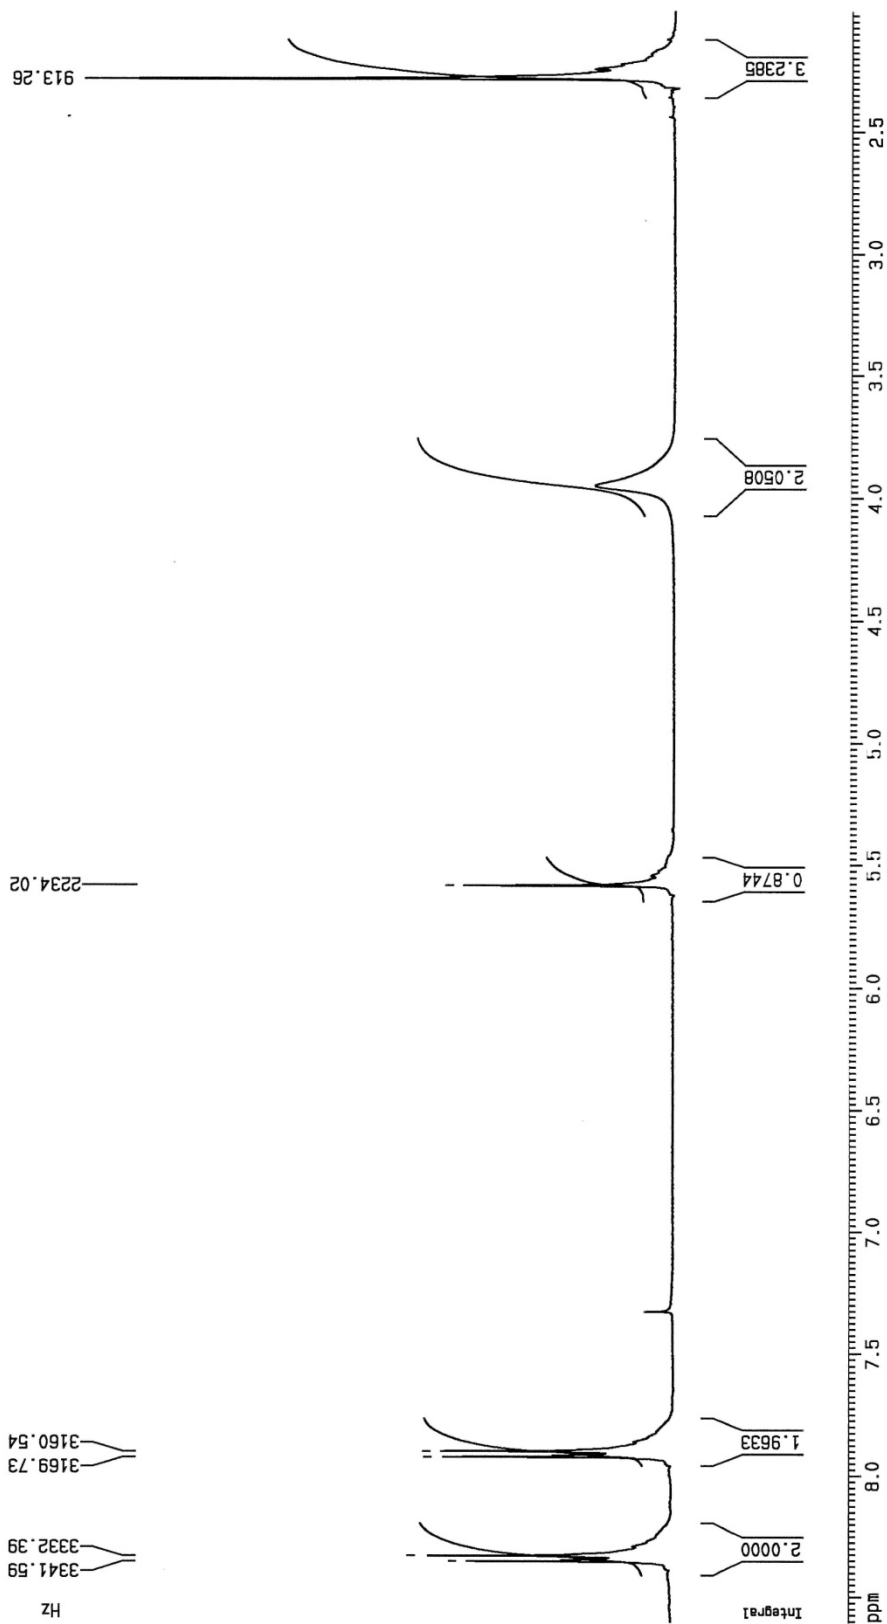

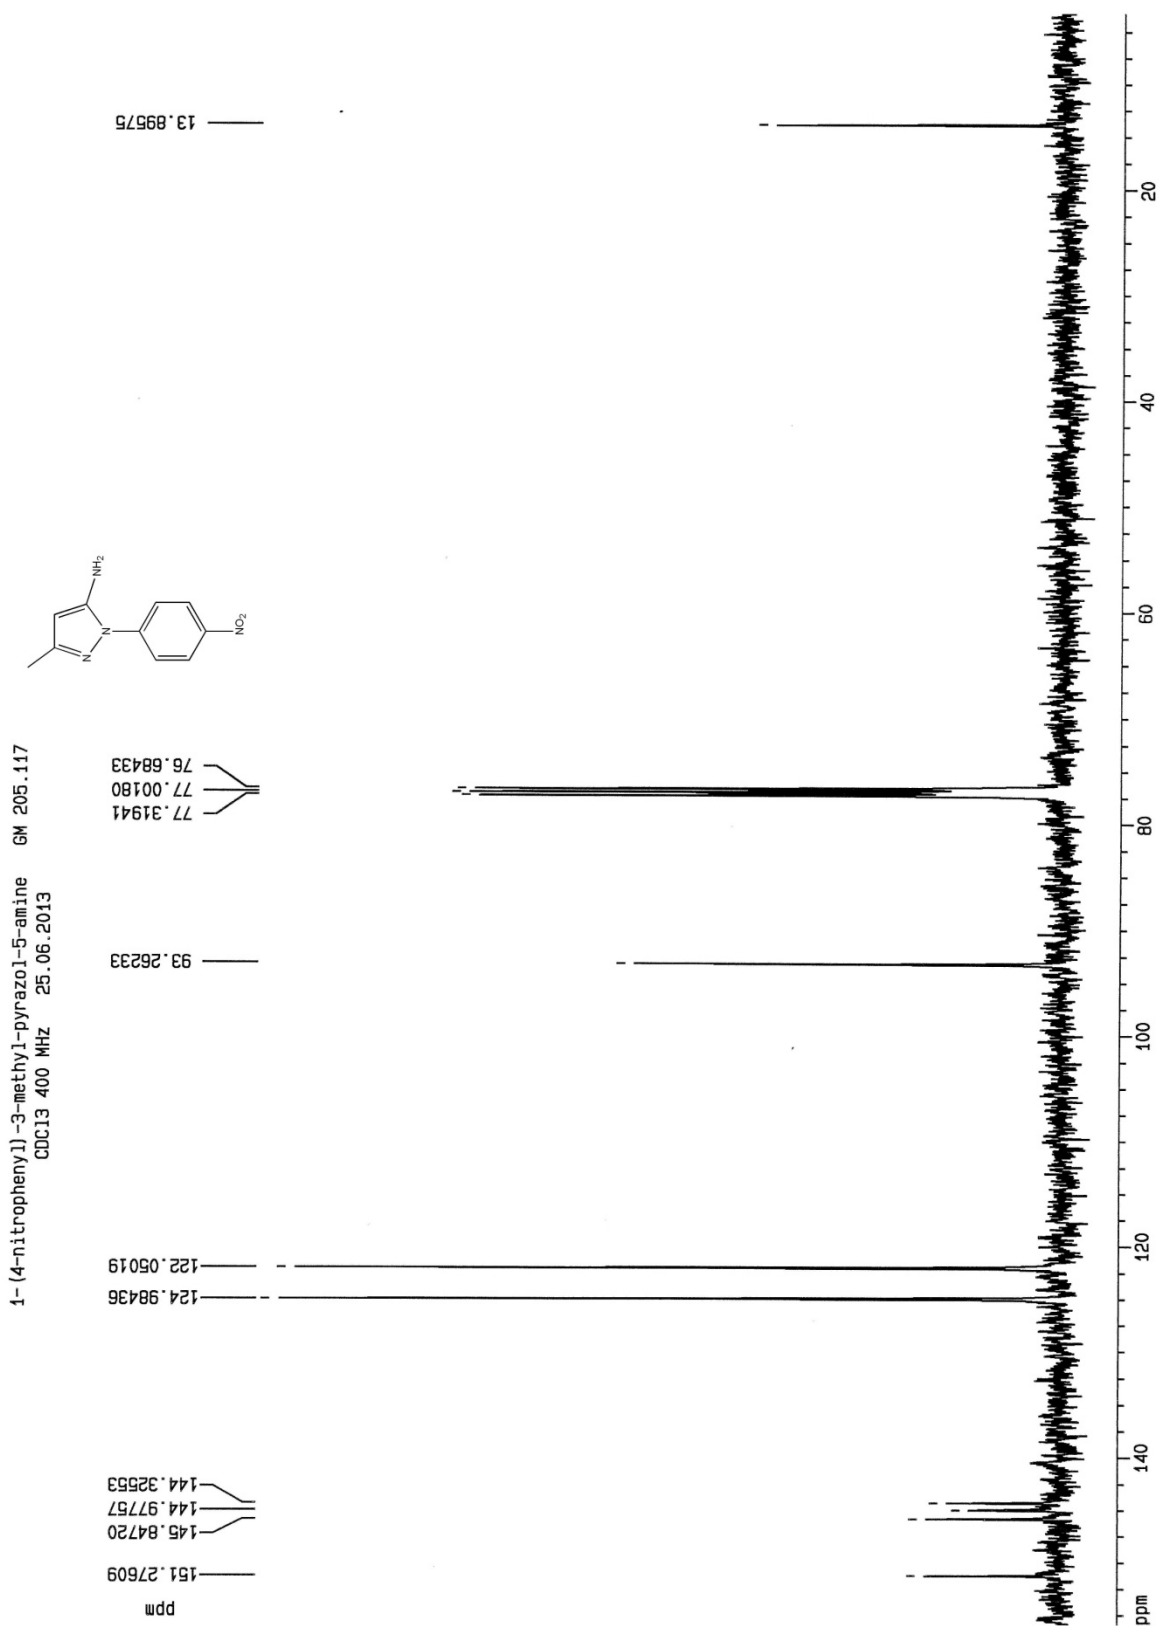

exp.58 GM 205.129 1-(2-carboxyphenyl)-3-methyl-1H-pyrazol-5-amine  
DMSO-d6 400 MHz 29.08.2013

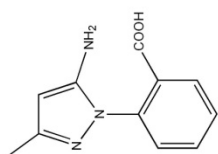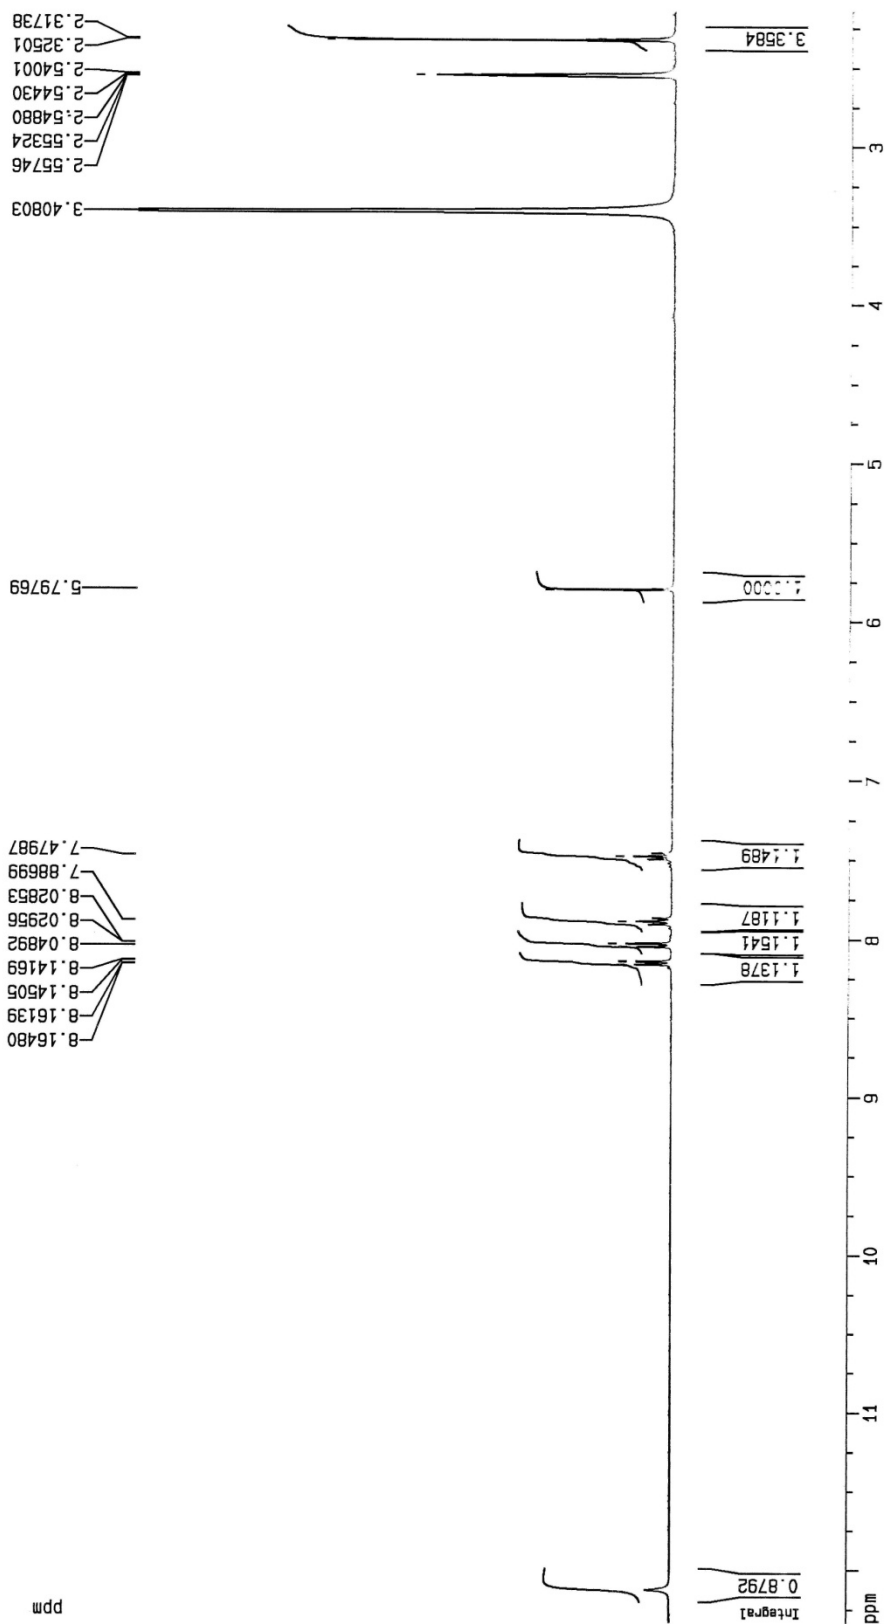

exp. 58 um 200.125 1-2-carboxypyridinyl-3-methyl-1H-pyrazol-1-c-amine  
DMSO-d6 400 MHz 29.08.2013

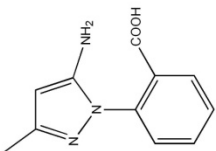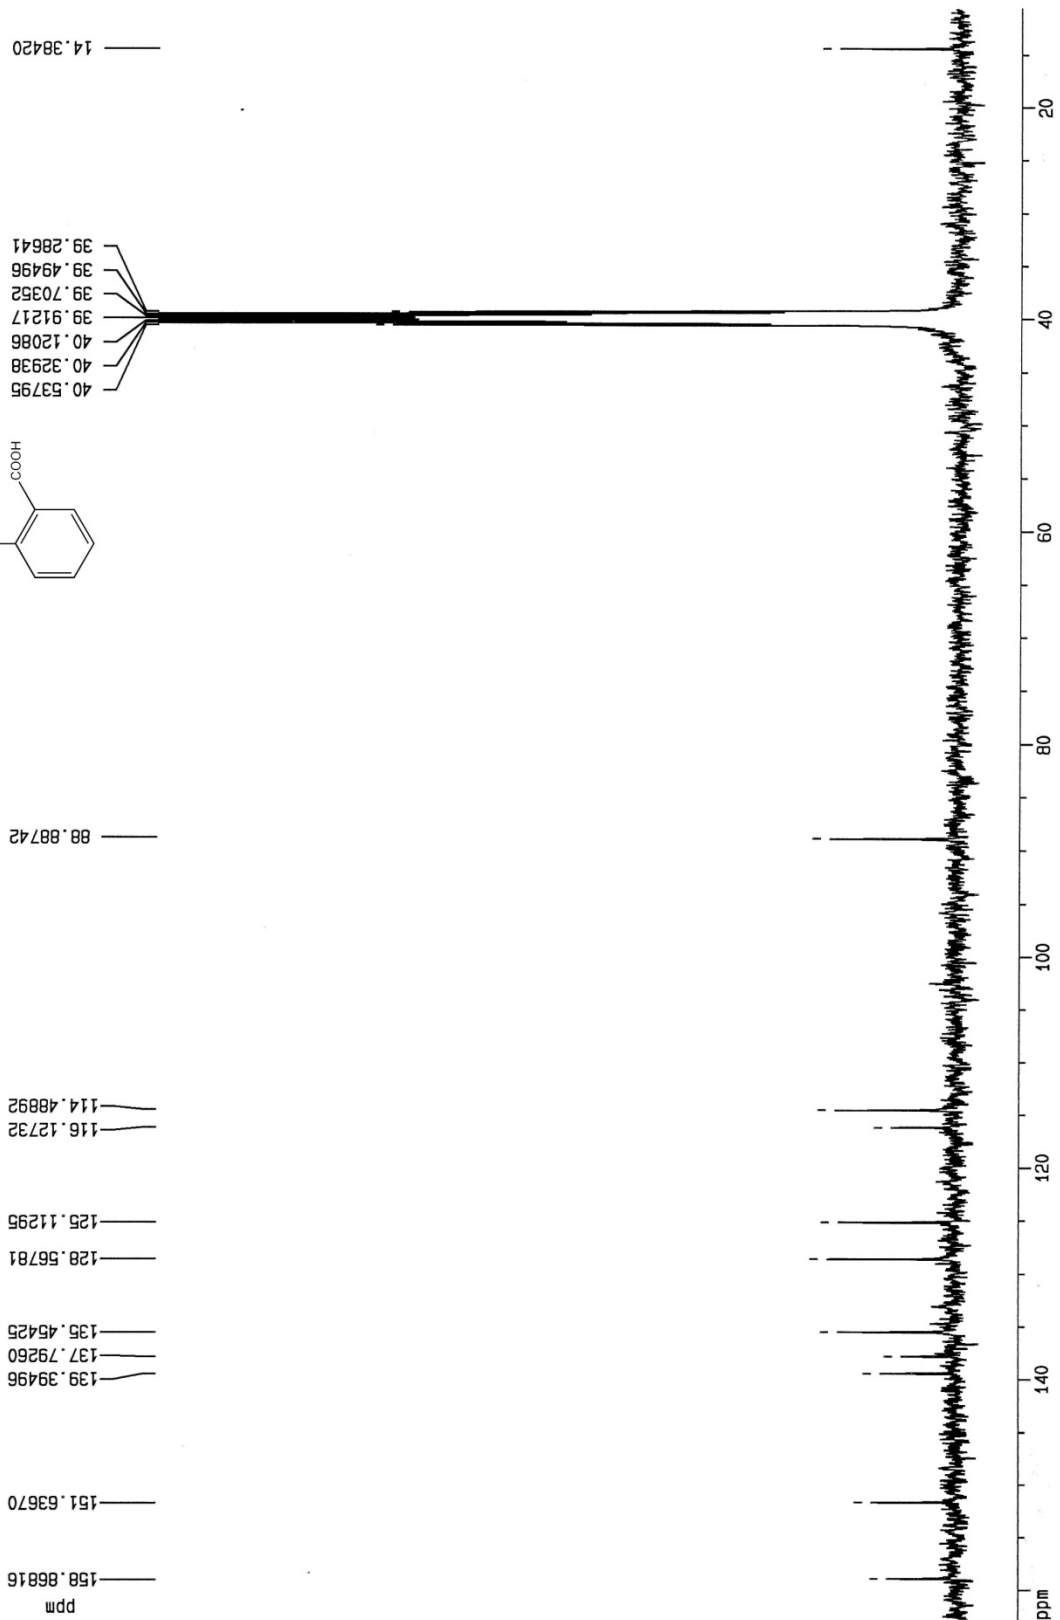

exp. 61 GM 205.132 1-(3-carboxyphenyl)-3-methyl-1H-pyrazol-5-amine hydrochloride  
DMSO-d6 400 MHz 29.08.2013

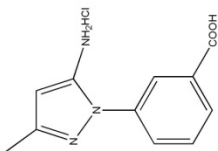

ppm  
8.11859  
8.11420  
8.10987  
8.10201  
7.91233  
7.89086  
7.79360  
7.77335  
7.75326

5.76702

2.54838  
2.31741

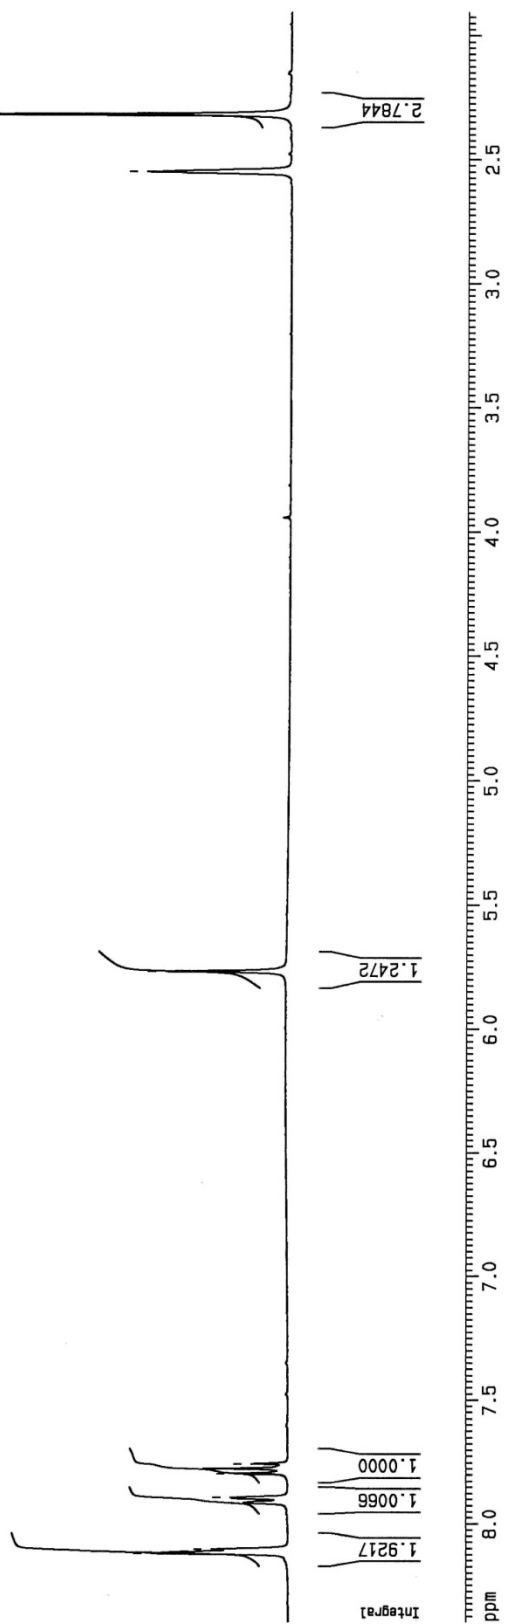

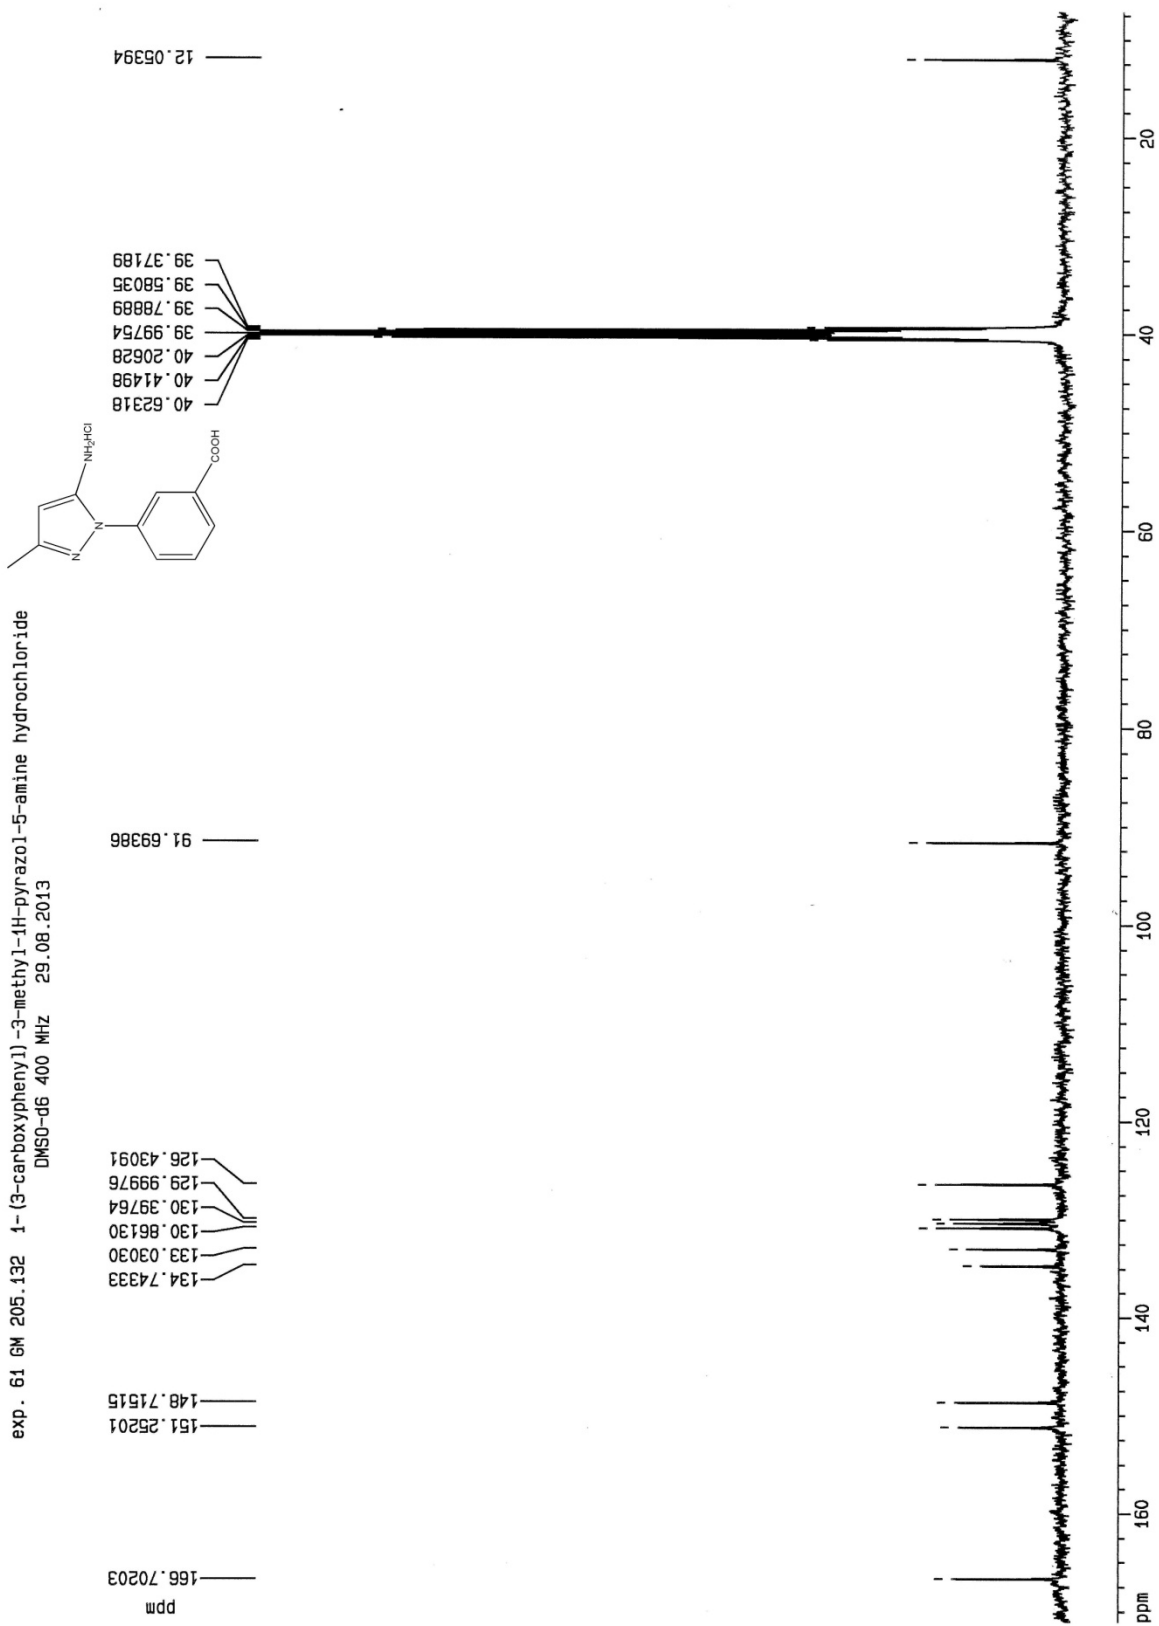

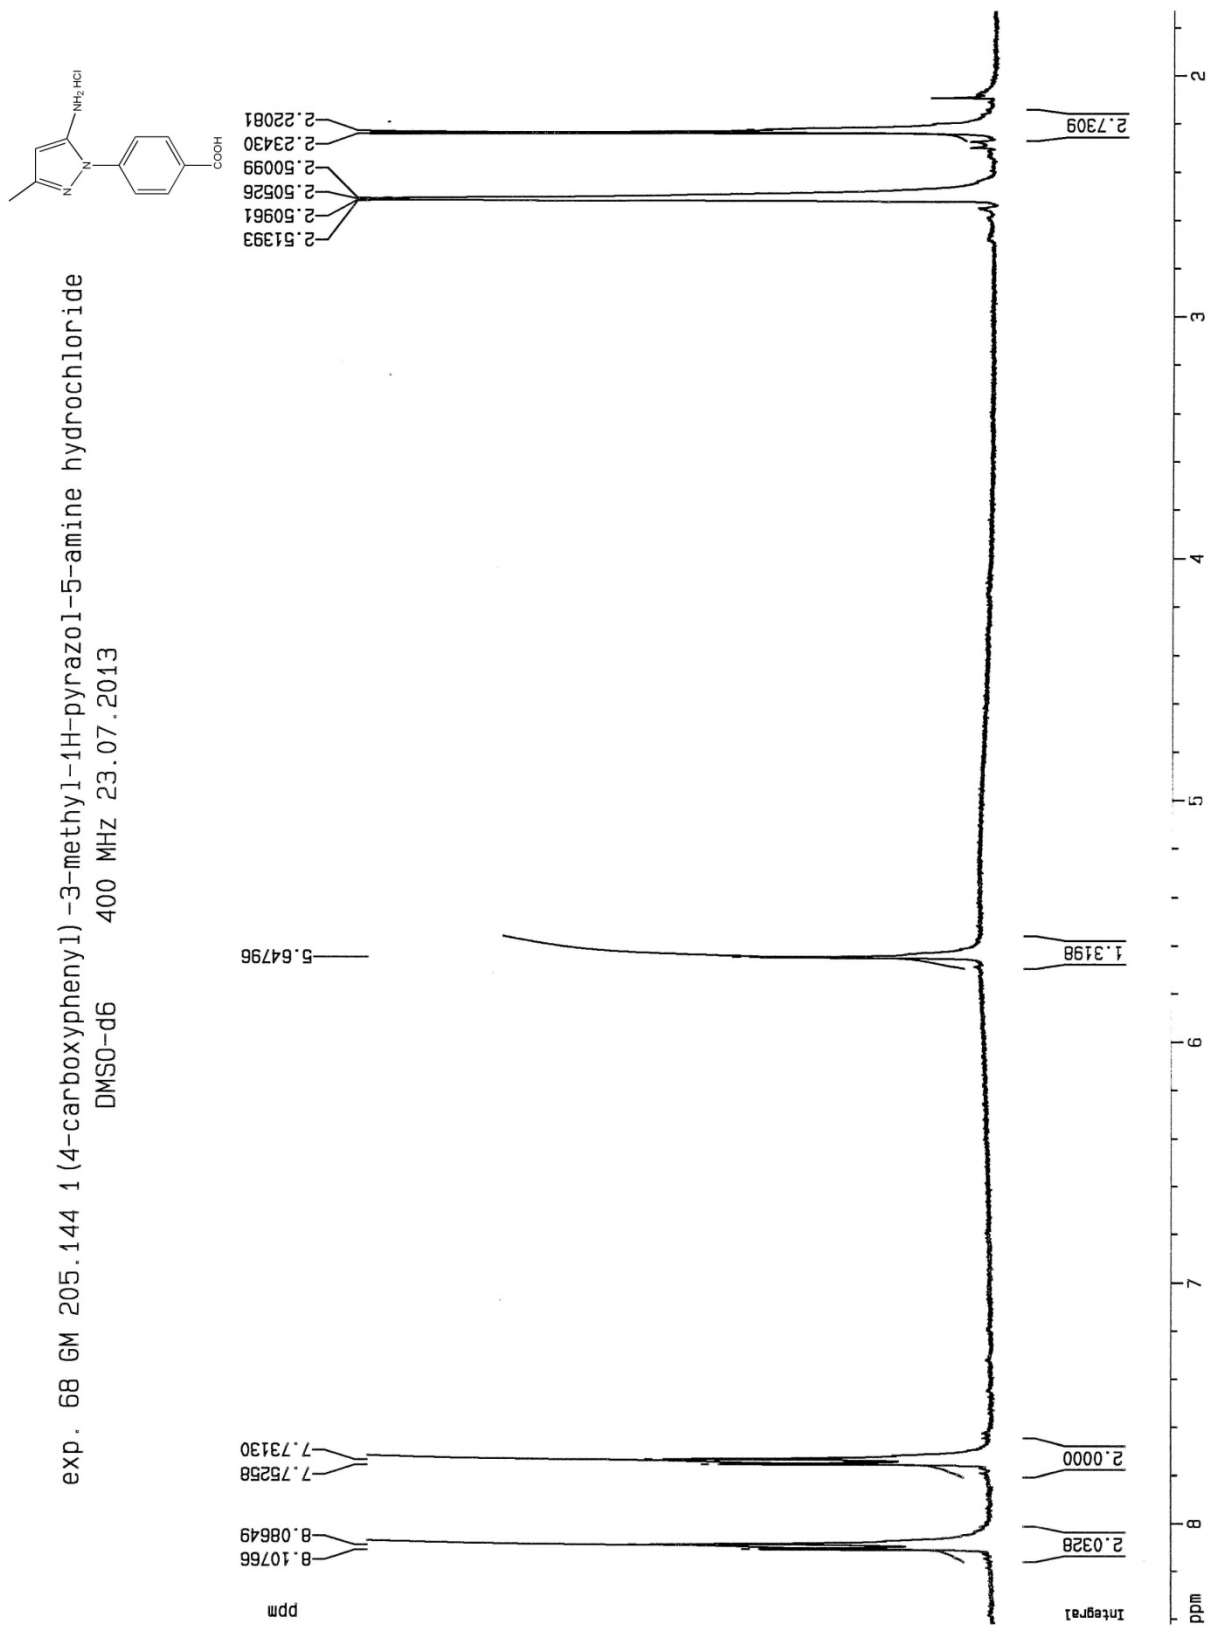



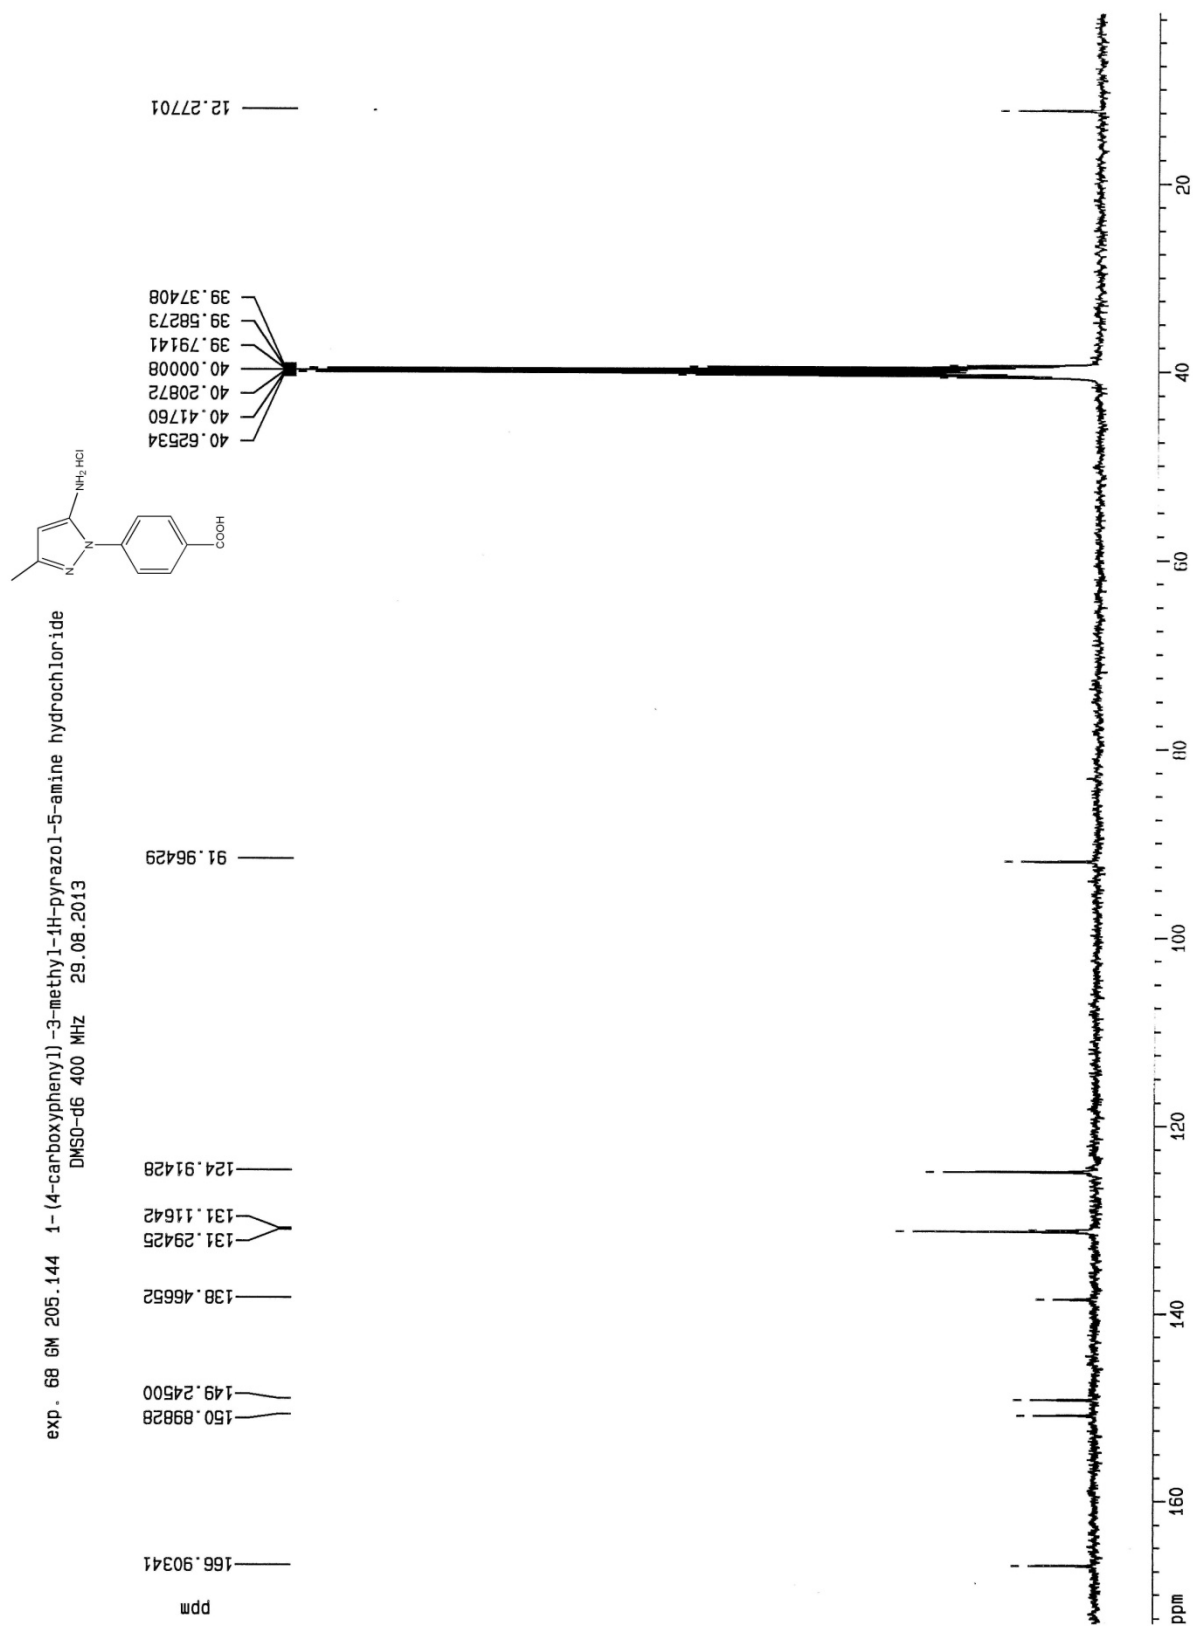

1-(phenyl)-3-methyl-pyrazol-5-amine GM 205.114  
CDC13 400 MHz 7.06.2013

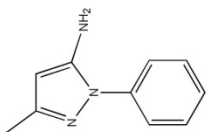

7.60100  
7.59773  
7.59671  
7.58181  
7.57938  
7.57651  
7.52113  
7.50231  
7.48176  
7.38504  
7.36664

5.49508

2.28417  
2.27736

Integral  
1.7028  
2.0000  
0.9044

0.8428

1.6646

2.8732

ppm

2 3 4 5 6 7

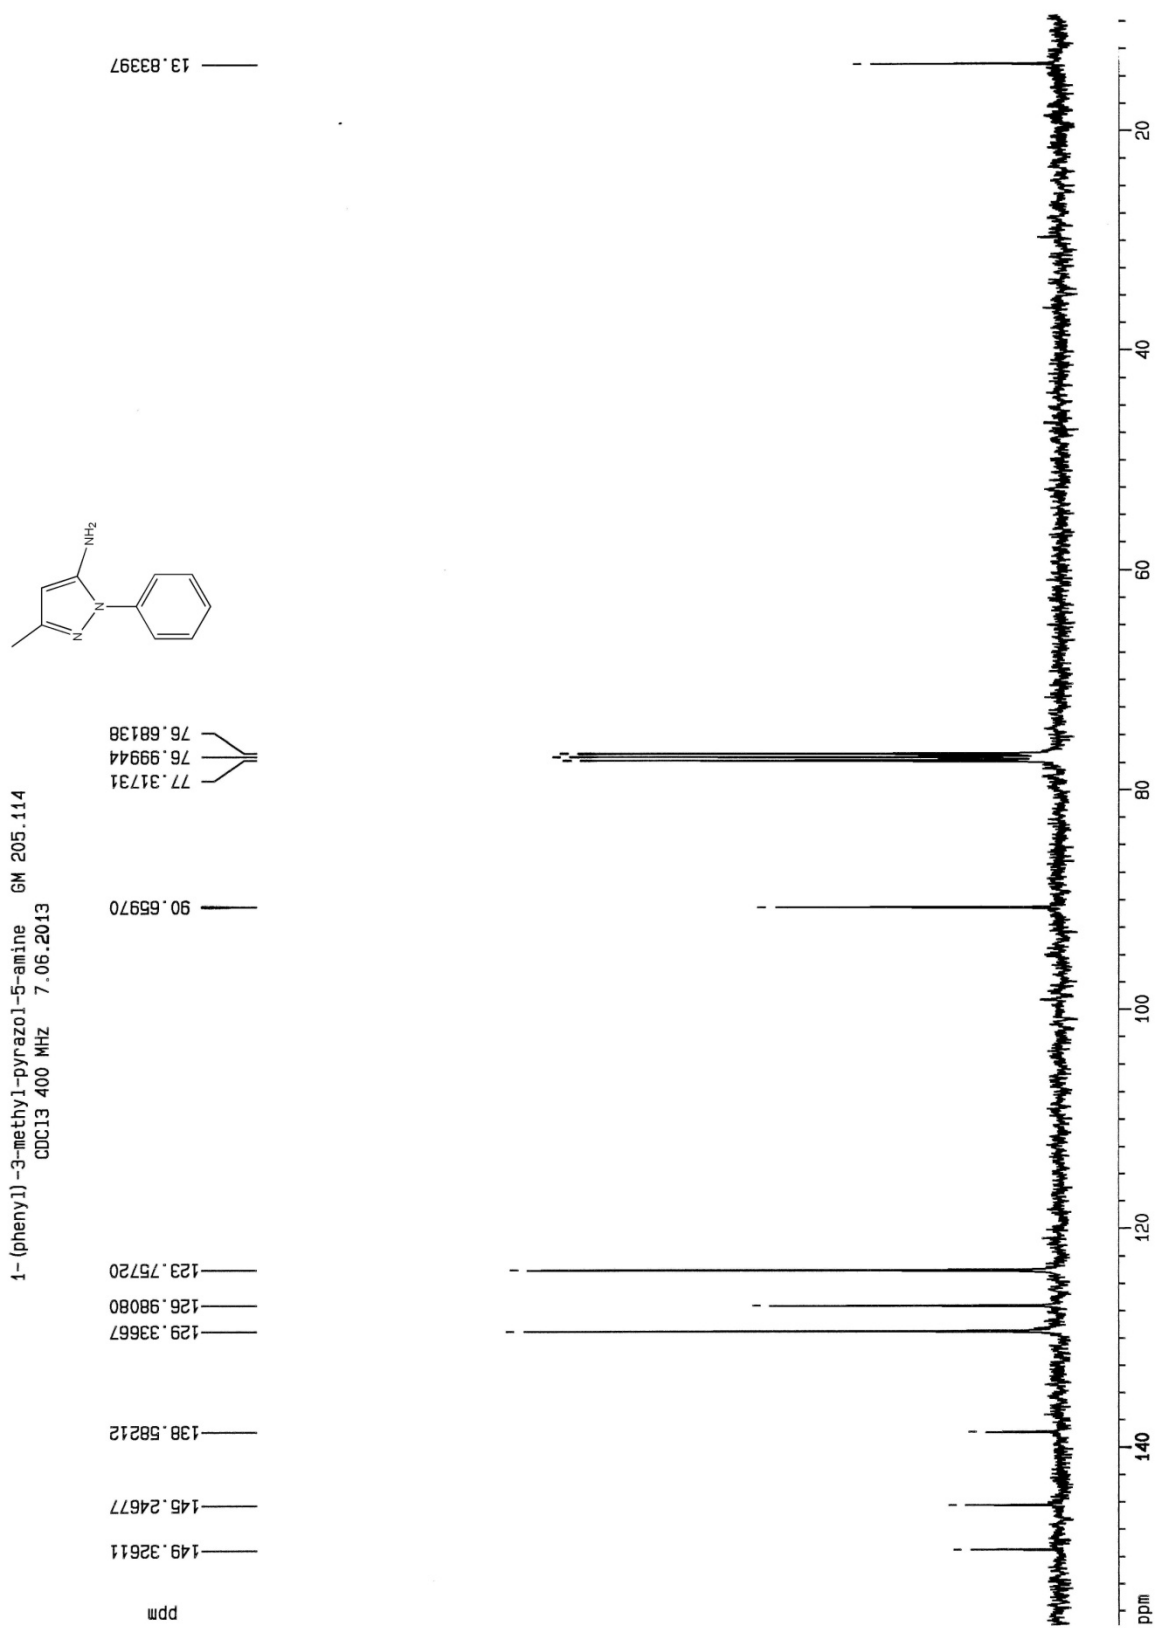

1-(2-methoxyphenyl)-3-methyl-pyrazol-5-amine  
GM 205.113  
CDCl<sub>3</sub> 400 MHz 7.06.2013

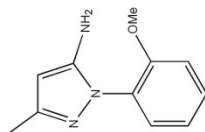

ppm  
7.50944  
7.50523  
7.49001  
7.48578  
7.12524  
7.12226  
7.10238  
7.08080  
7.07837

5.50666

3.91476

2.29860

Integrals  
1.0896  
0.9601  
1.9877

1.0336

4.7421

2.9972

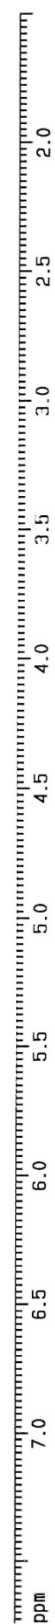

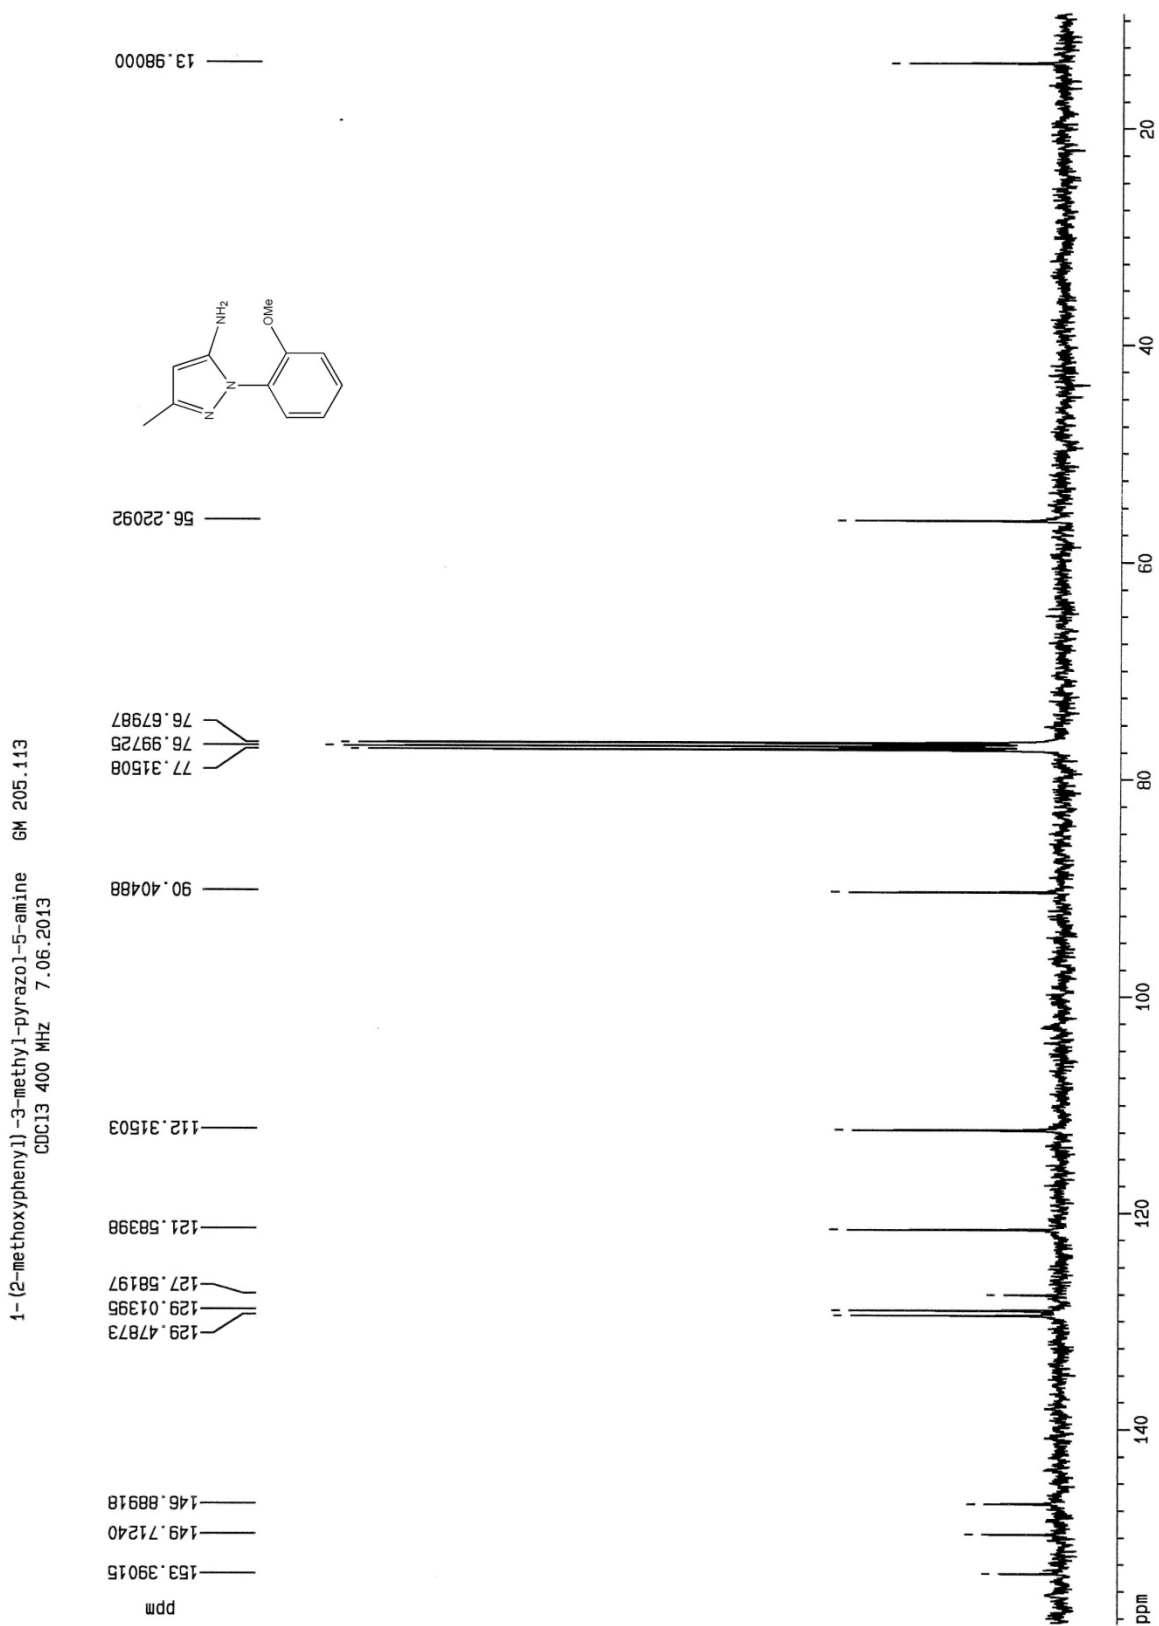

exp. 52 GM 205.121 1-(2-aminosulphonylphenyl)-3-methyl-1H-pyrazol-5-amine  
MeOH-d4 400 MHz 05.09.2013

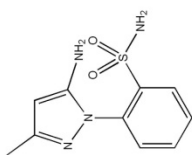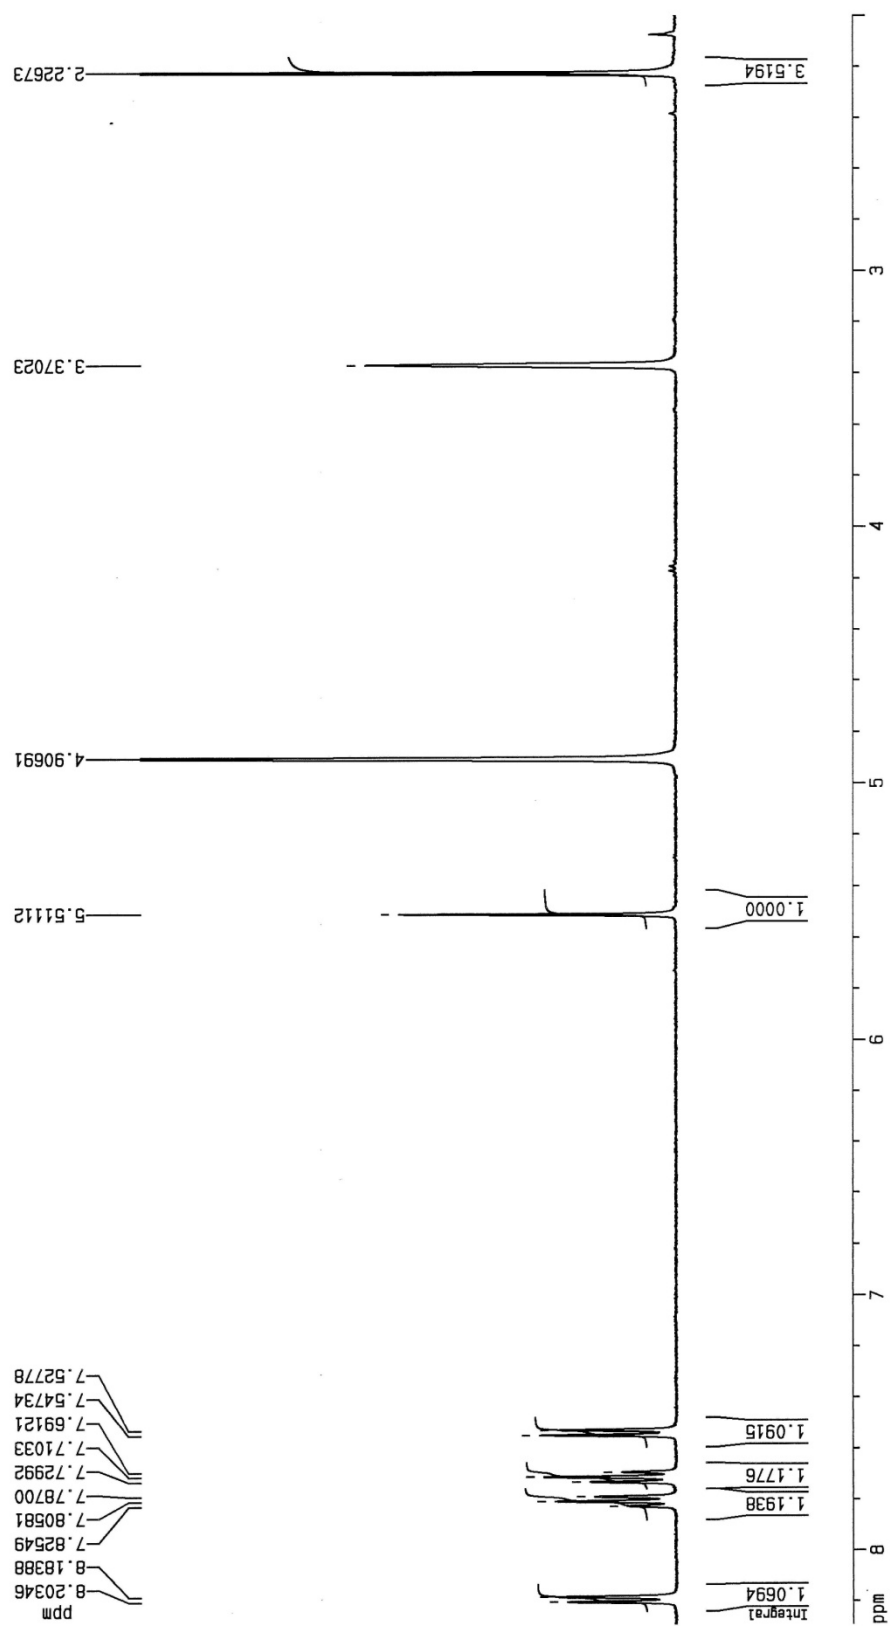

exp. 52 GM 205.121 1-(2-aminosulphonylphenyl)-3-methyl-4H-pyrazol-5-amine  
MeOH-d4 400 MHz 05.09.2013

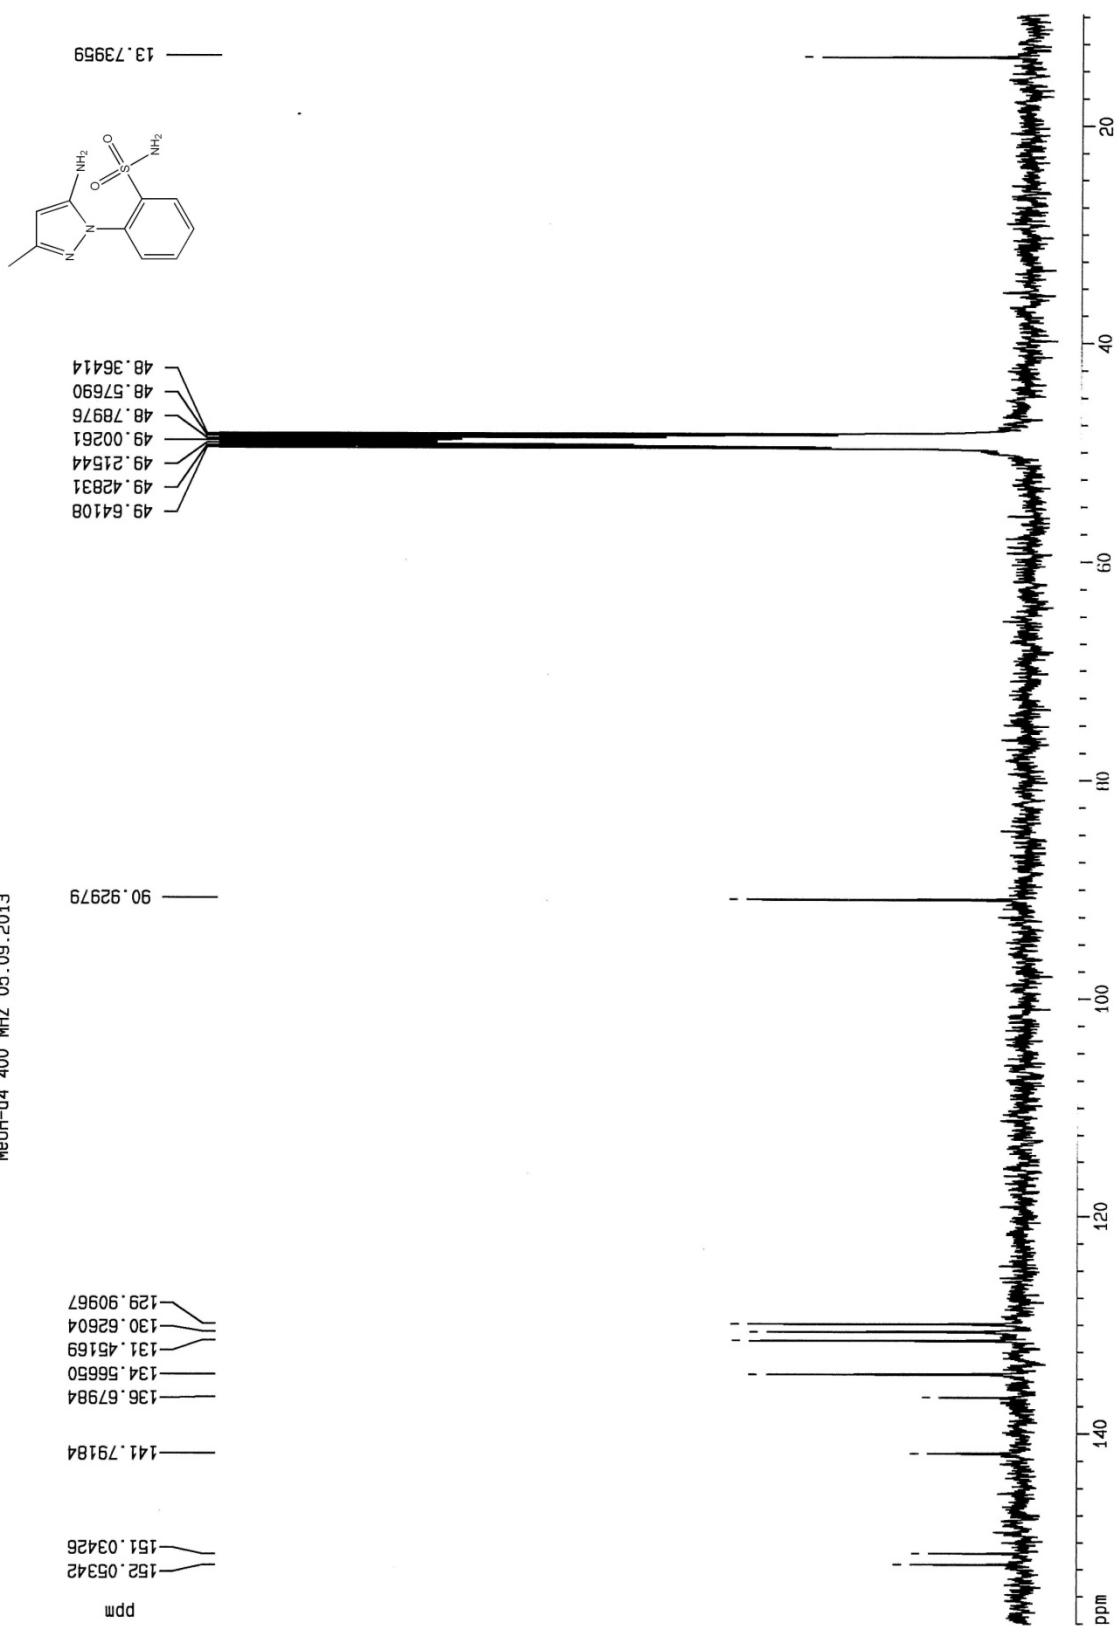

1-(3-methylsulphonylphenyl)-3-methyl-pyrazol-5-amine  
CDCl<sub>3</sub> 400 MHz 7.06.2013

GM 205.116

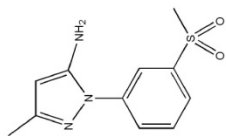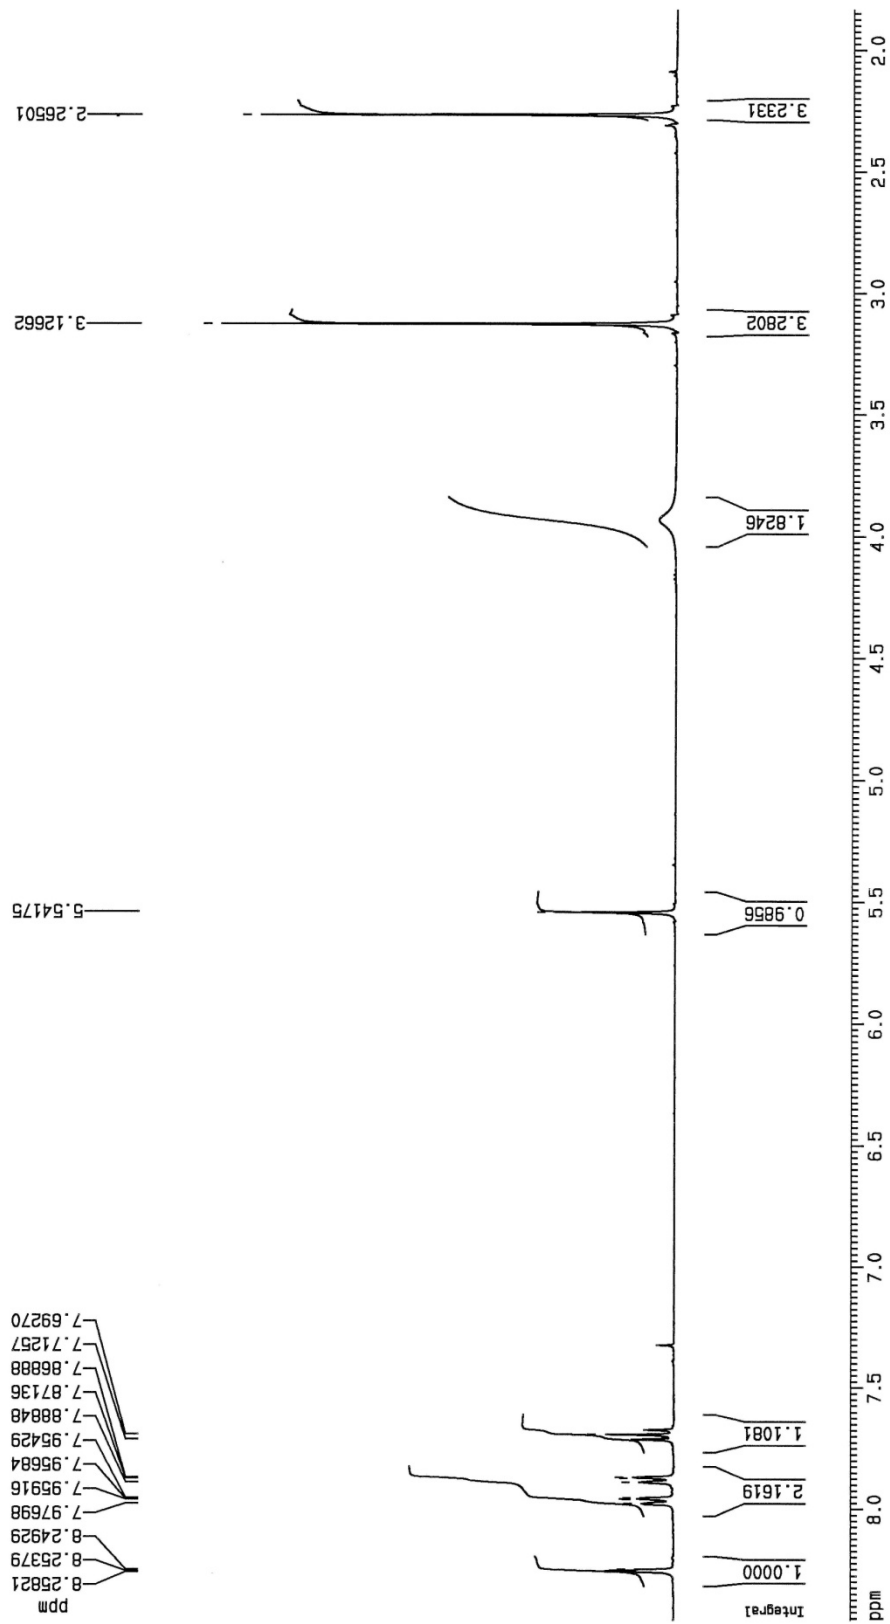



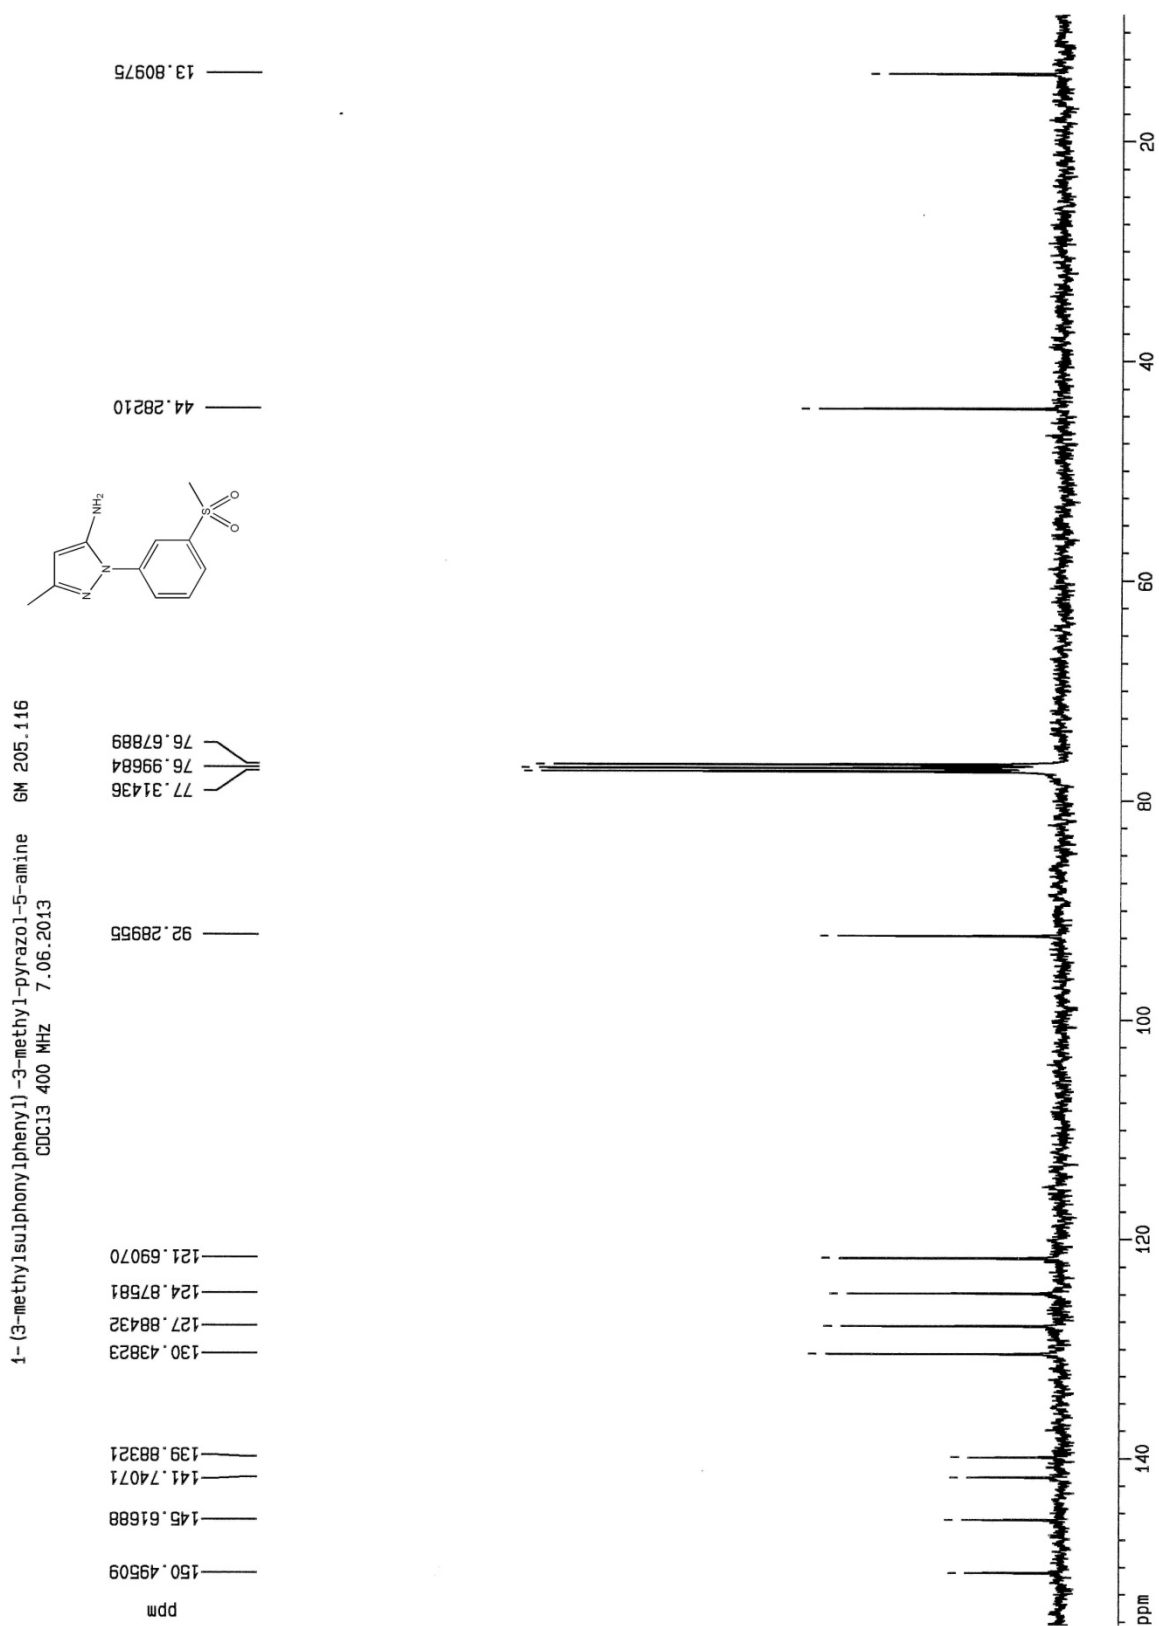

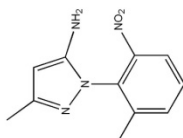

1-(2-nitro-6-methylphenyl)-3-methyl-1H-pyrazol-5-amine GM 205.107  
CDC13 400 MHz 7.06.2013

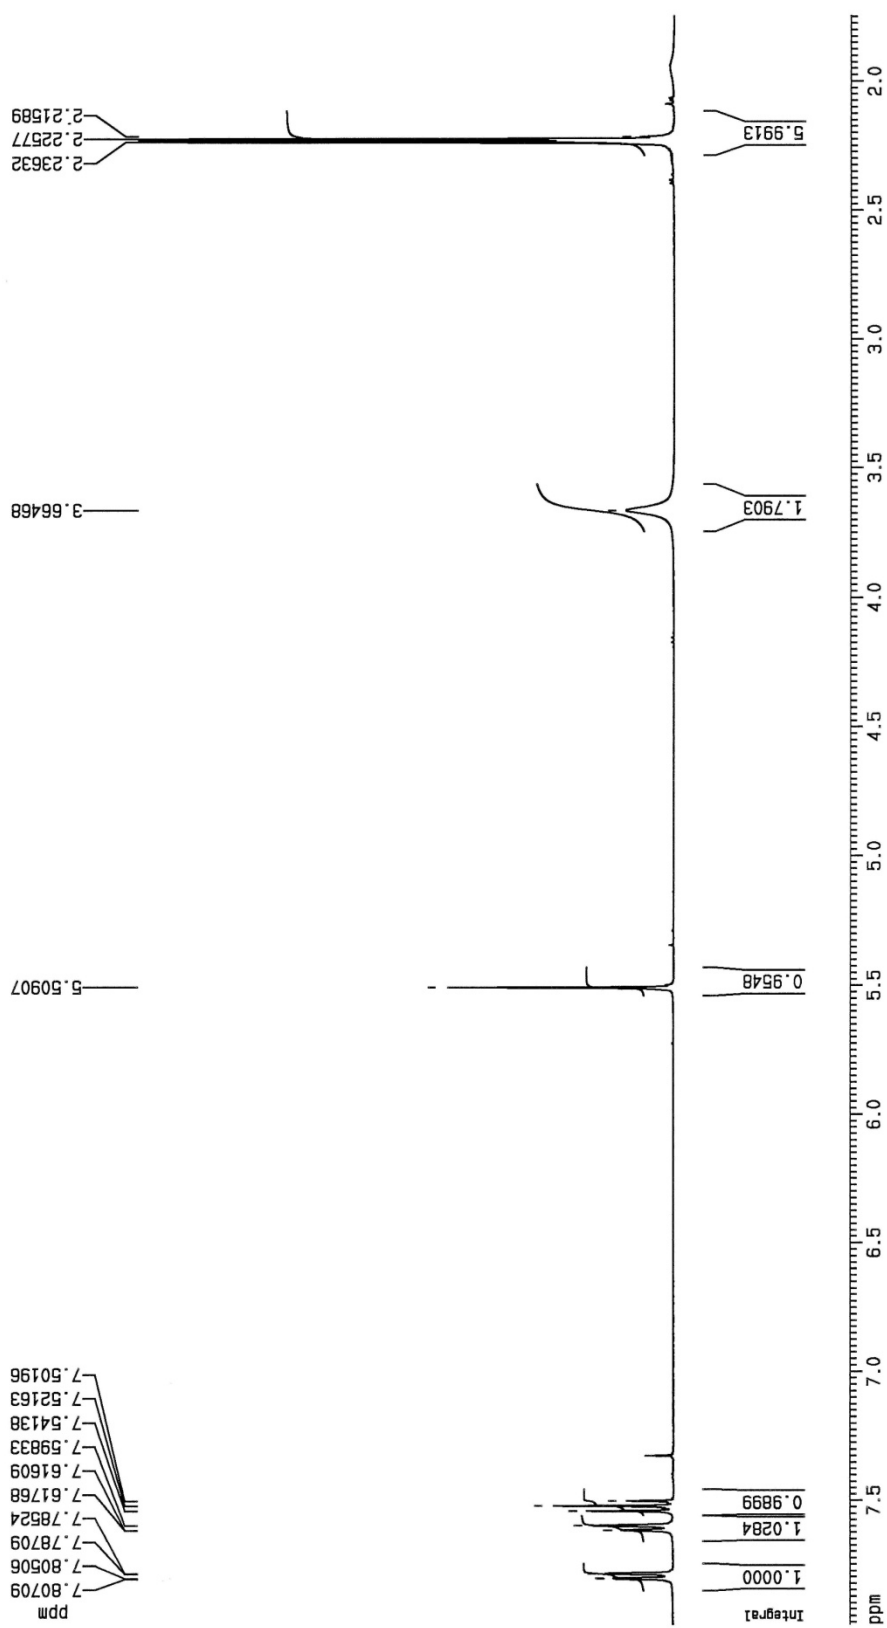

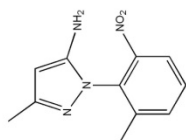

1-(2-nitro-6-methylphenyl)-3-methyl-1H-pyrazol-5-amine  
CDC13 400 MHz 7.06.2013 GM 205.107

ppm

|           |
|-----------|
| 150.84052 |
| 148.50937 |
| 147.51692 |
| 141.09171 |
| 134.94237 |
| 130.16734 |
| 129.57645 |
| 122.13865 |
| 90.39926  |
| 77.32185  |
| 77.00394  |
| 76.68608  |
| 17.32234  |
| 13.96115  |

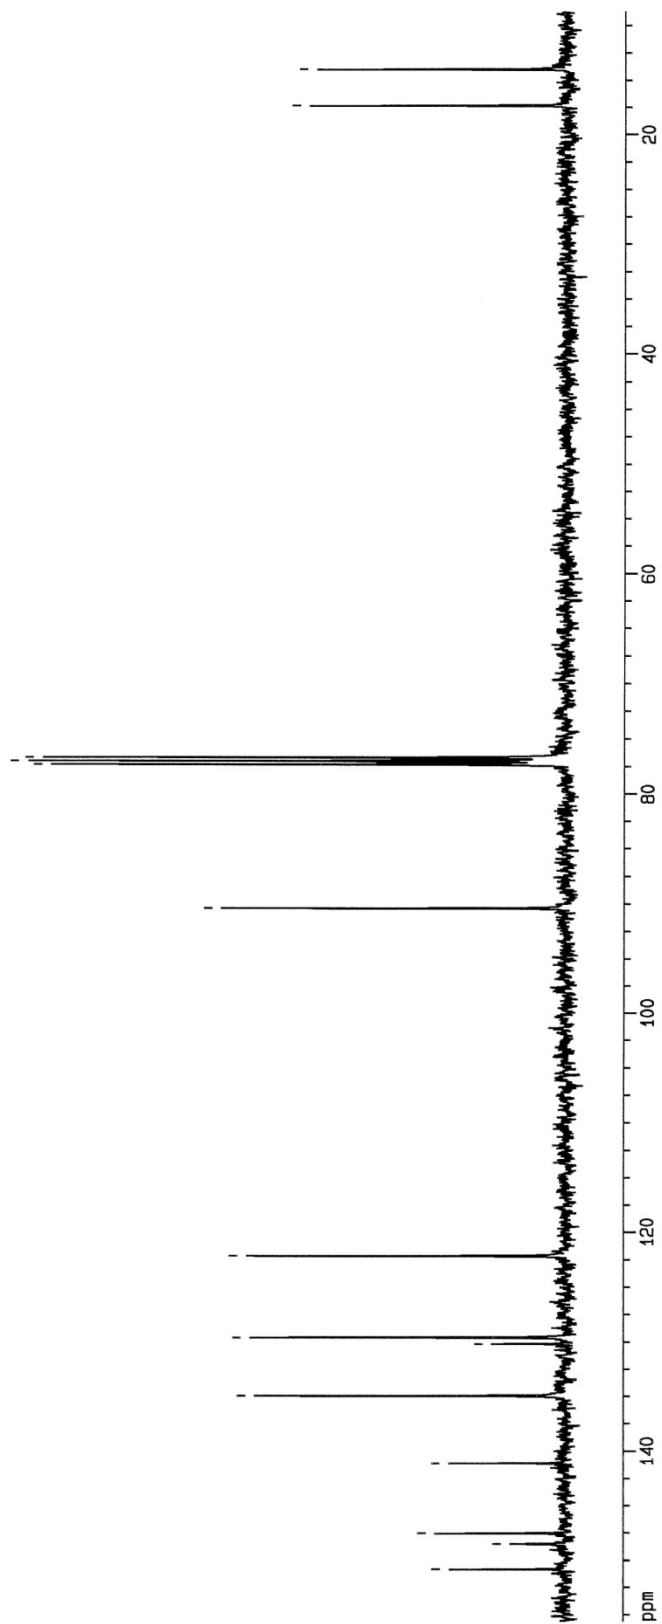

1-(2-methoxy-4-nitrophenyl)-3-methyl-pyrazol-5-amine GM 205.111  
CDCl3 400 MHz 7.06.2013

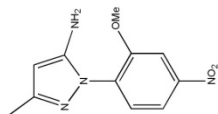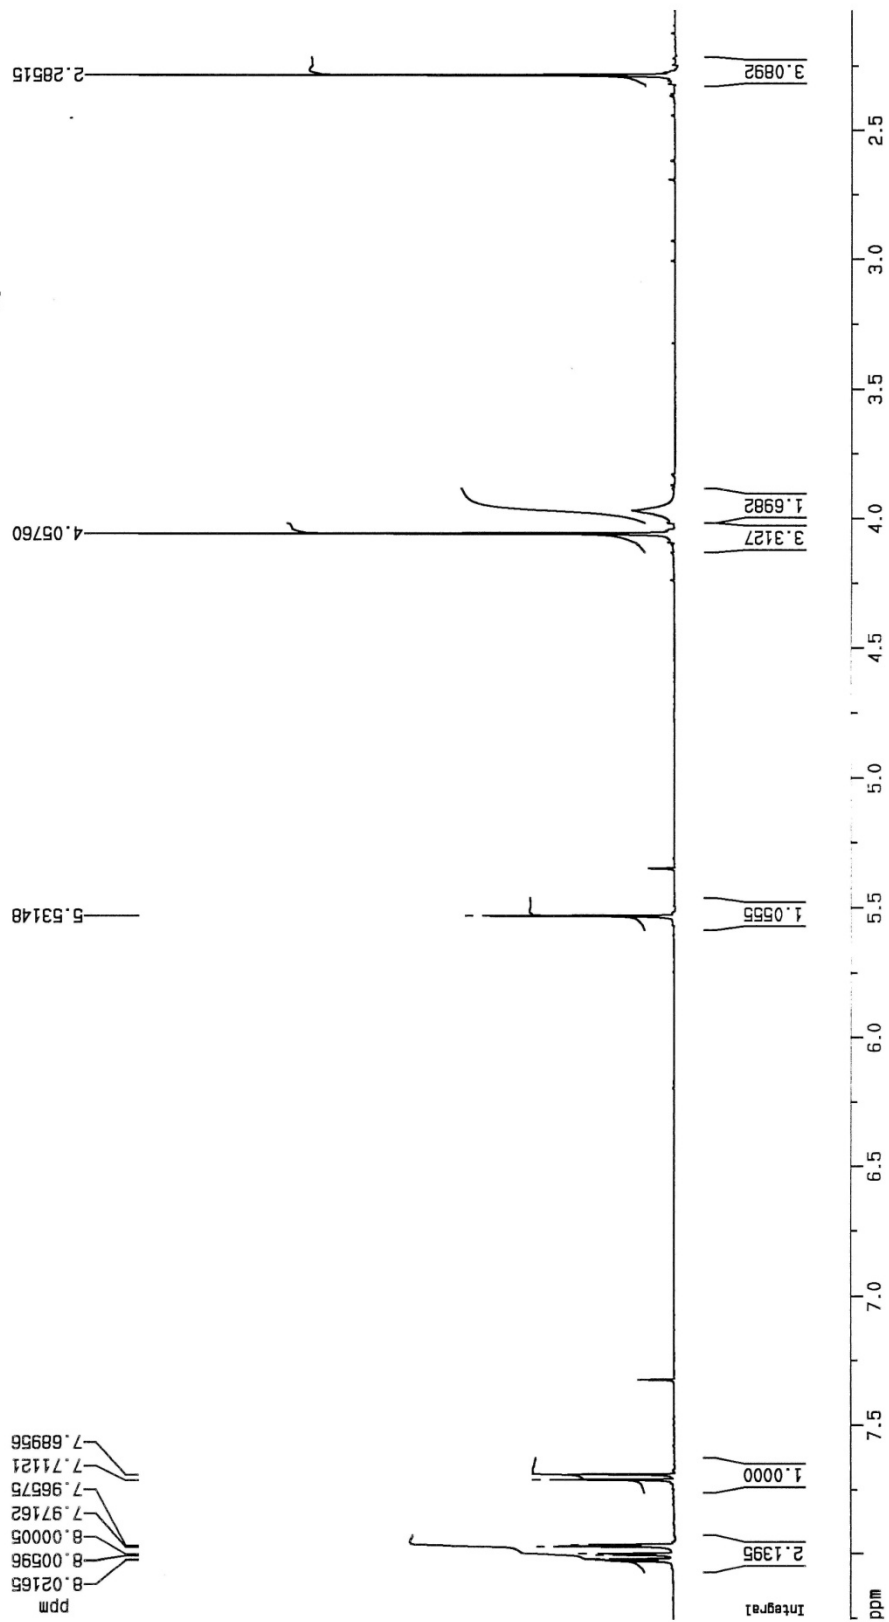

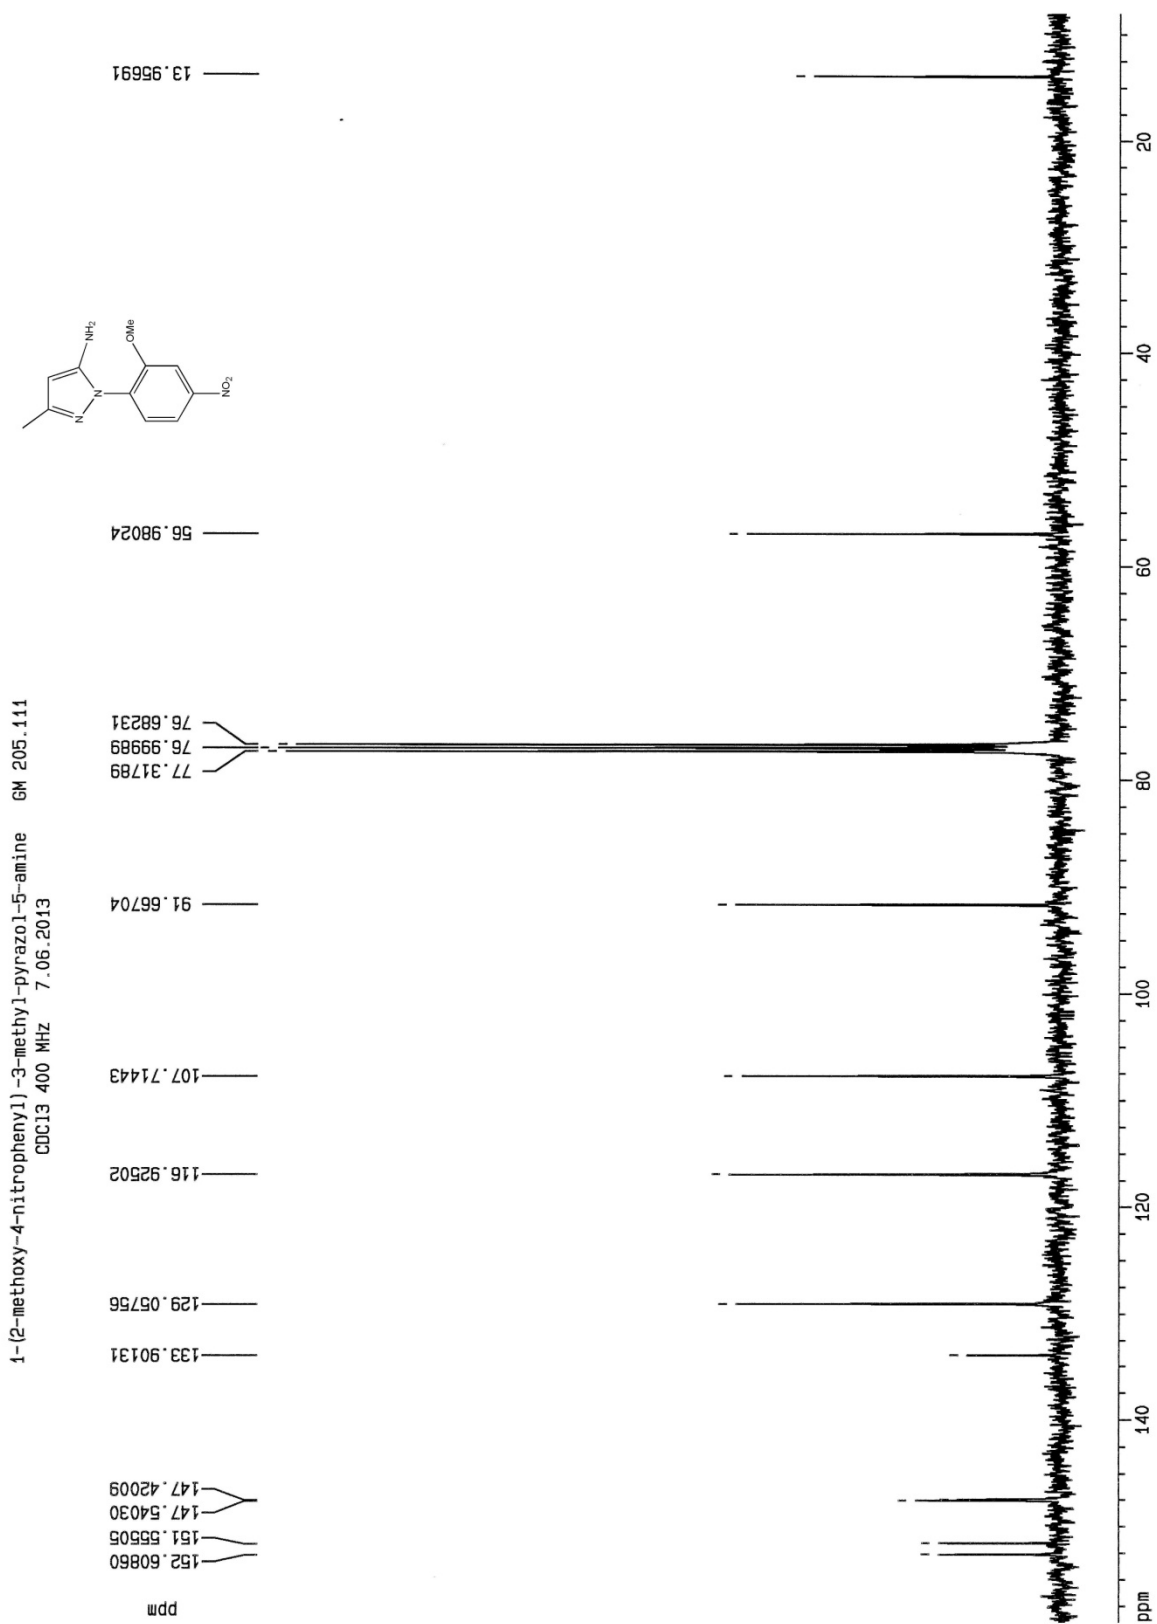

exp.64 GM 205.135 1-(2-chlorophenyl)-3-phenylpyrazol-5-amine  
CDC13 400 MHz 30.08 2013

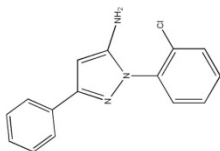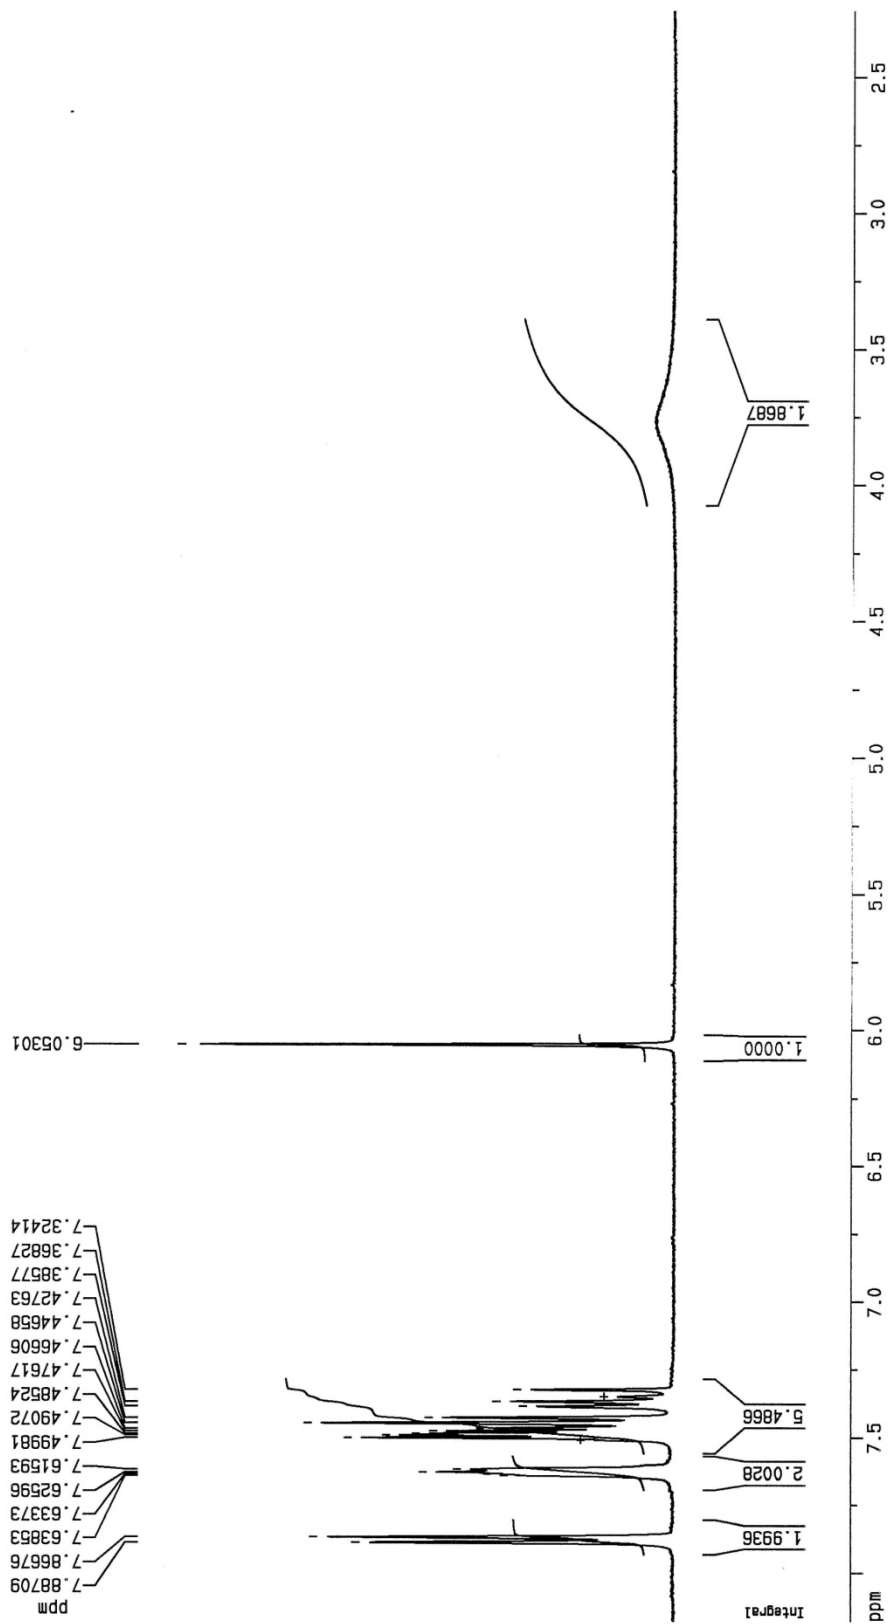

exp. 64 GM 205.135 1-(2-chlorophenyl)-3-phenyl-1H-pyrazol-5-amine  
CDC13 400 MHz 30.08.2013

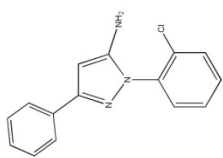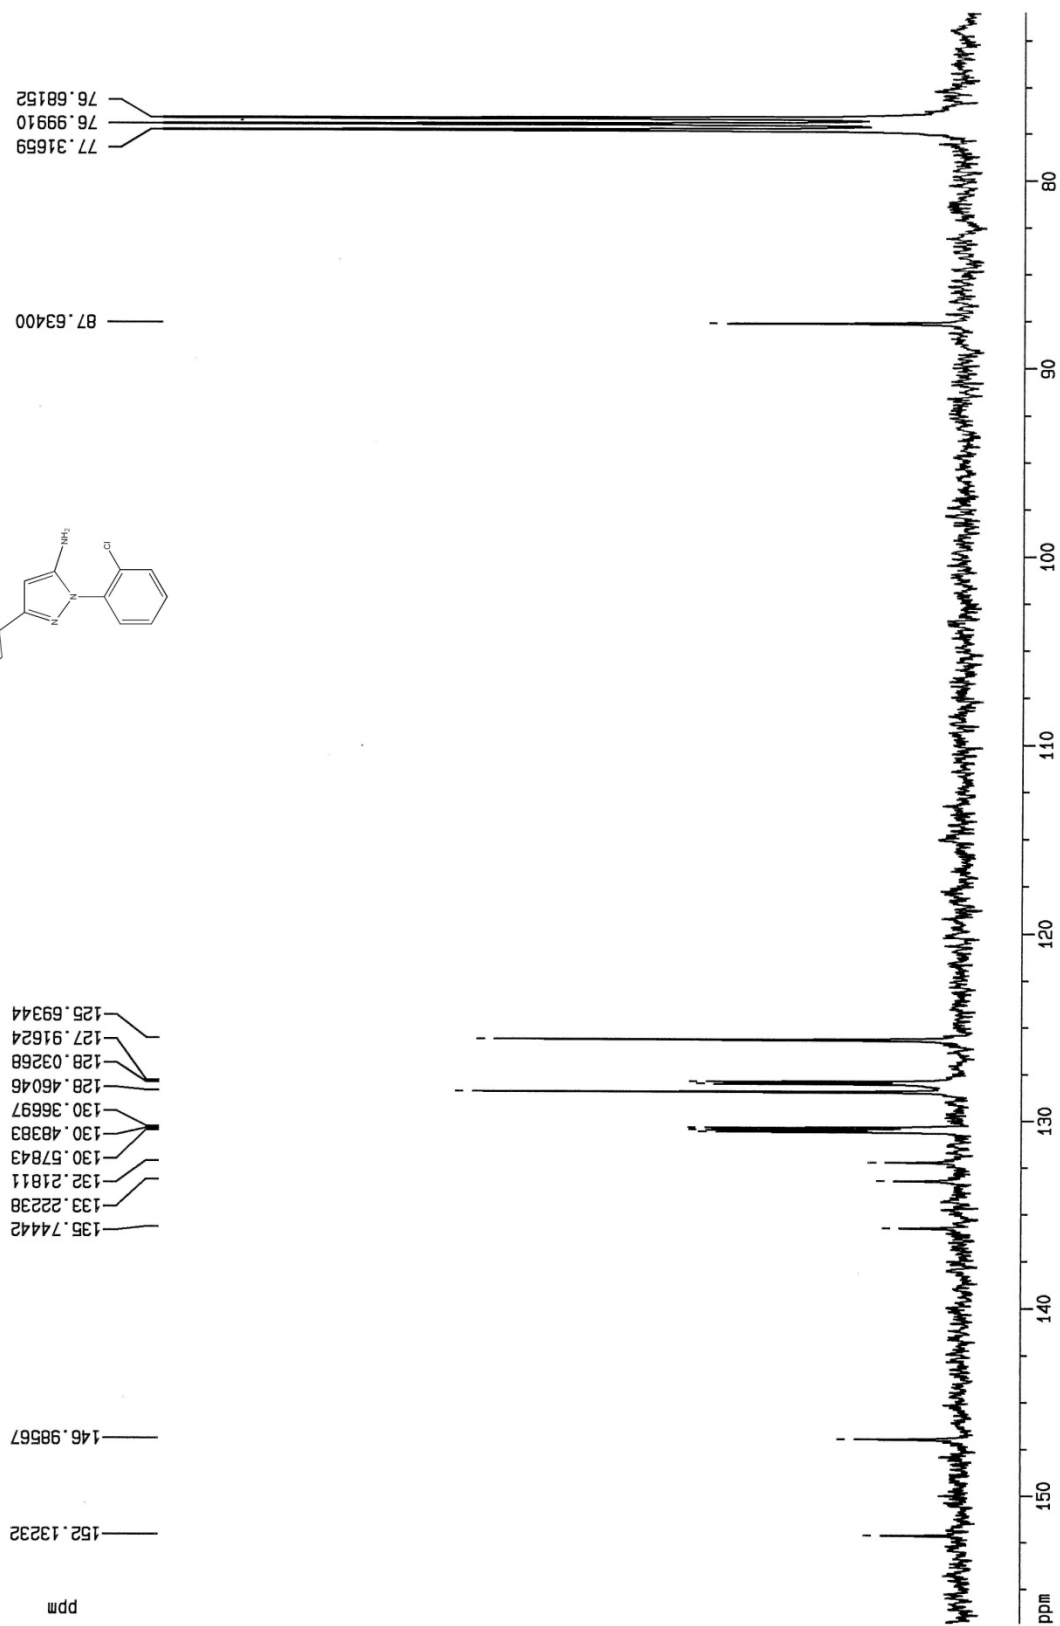

exp.66 GM 205.140 1-(2-chlorophenyl)-1H-pyrazol-5-amine  
CDC13 400 MHz 30.08 2013

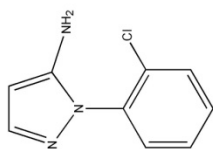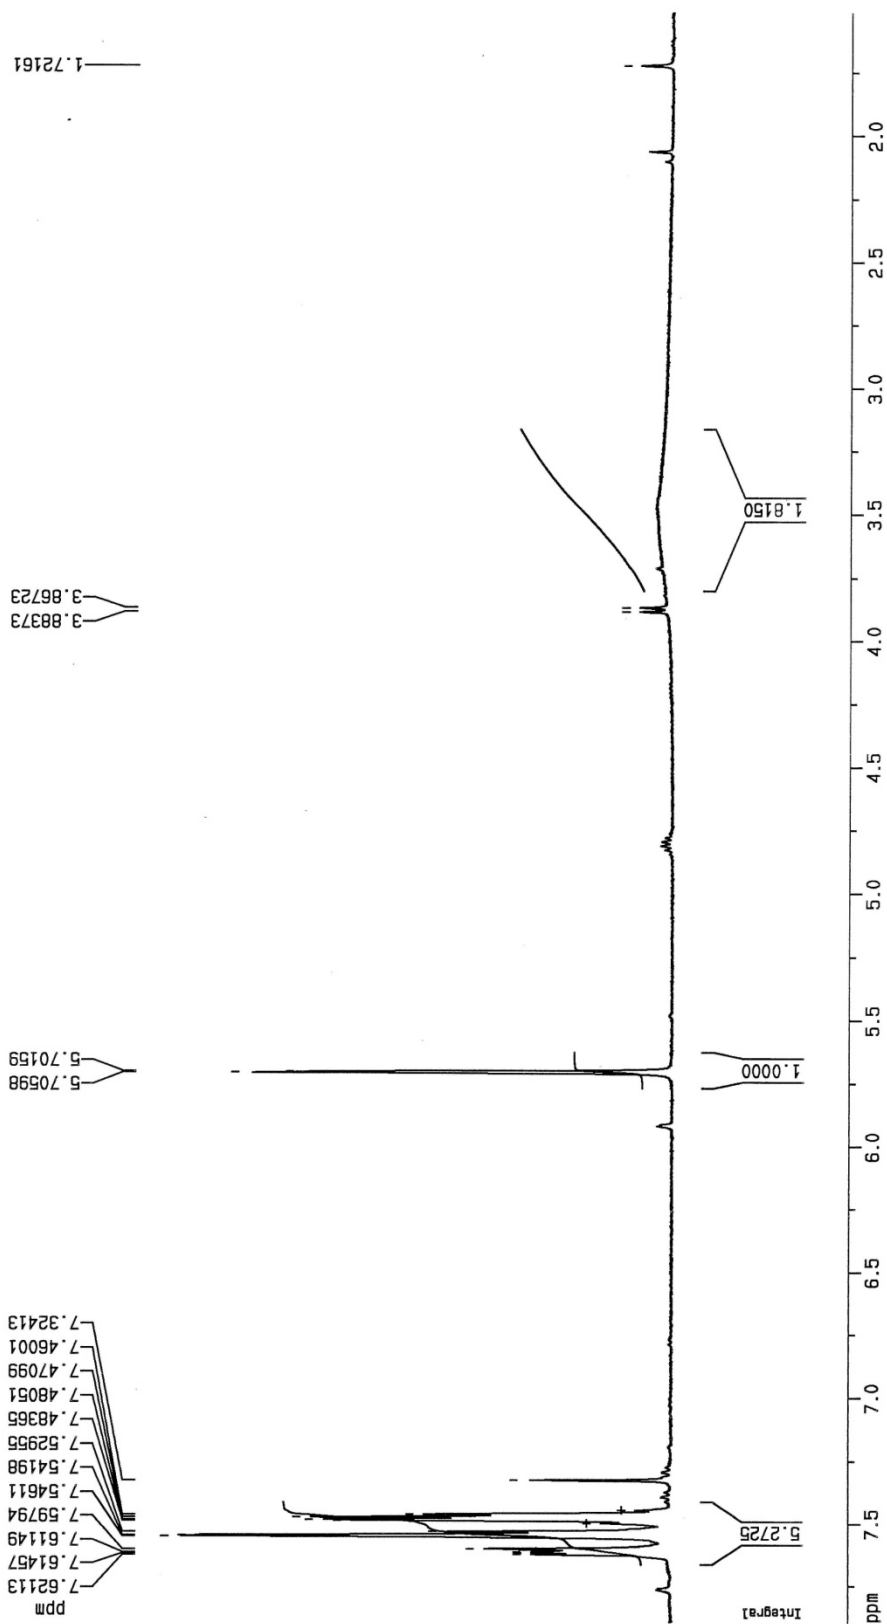



exp. 66 GM 205.140 1-(2-chlorophenyl)-1H-pyrazol-5-amine  
CDC13 400 MHz 30.08.2013

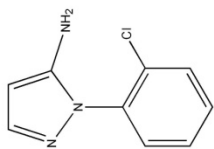

145.93364  
140.84512  
135.72311  
132.19872  
130.52388  
130.46207  
130.09500  
127.92979

77.32132  
77.00389  
76.68639

90.15820

ppm

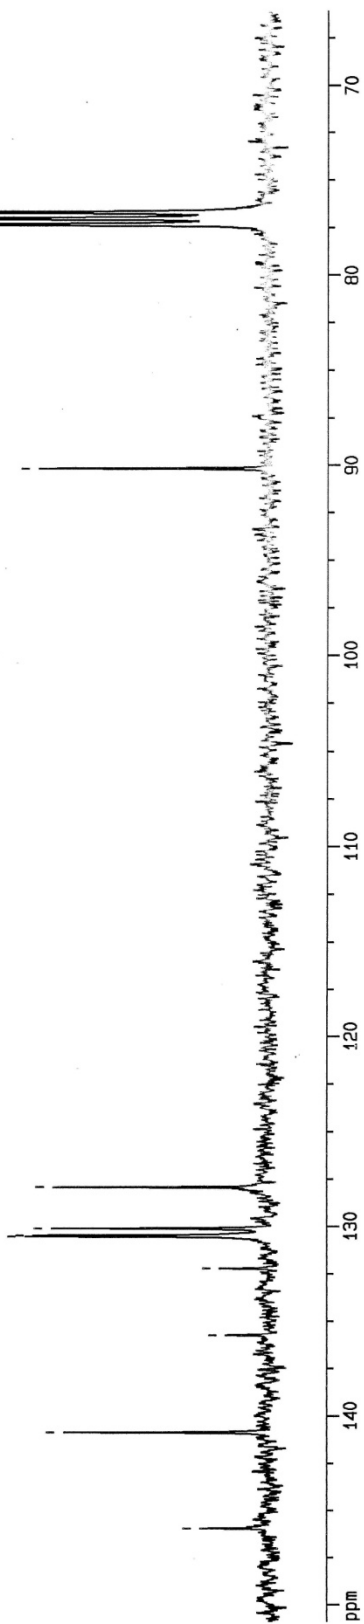

## References

- 1 C. Alberti, C. Tironi; *Farmaco*, 1964, **19**, 638-651.
- 2 P. Kurtz, H. Gold, H. Disselnkotter, *Liebigs Ann. Chem.*, 1959, **624**, 1-25
- 3 *US Pat.*, 3 198 791, 1965.
- 4 B. Agai, G. Hornyak, K. Lempert, *Period. Polytech. Eng.*, 1982, **26**, 221-228.
- 5 M. Hunsberger, E. R. Shaw, J. Fugger, R. Ketcham, D. Lednicer, *J. Org. Chem.*, 1956, **21**, 394-399
- 6 E. Koike, H. Iida, M. Okawa, A. Kashioka, *Nippon Kagaku Kaishi (1921-47)*; 1954, **57**, 56-58.
- 7 T. De Paulis, K. Hemstapat, Y. Chen, Y. Zhang, S. Saleh, D. Alagille, R. M. Baldwin, G. D. Tamagnan, P. J. Conn, *J. Med. Chem.*, 2006, **49**, 3332-3344.
